## Correlated Evolution of two Copulatory Organs via a Single Cis-Regulatory Nucleotide Change

Olga Nagy<sup>1</sup>, Isabelle Nuez<sup>1</sup>, Rosina Savisaar<sup>1†</sup>, Alexandre E. Peluffo<sup>1</sup>, Amir Yassin<sup>2</sup>, Michael Lang<sup>1</sup>, David L. Stern<sup>3</sup>, Daniel R. Matute<sup>4</sup>, Jean R. David<sup>2,5</sup> and Virginie Courtier-Orgogozo<sup>1,6,\*</sup>

<sup>1</sup>Institut Jacques Monod, CNRS UMR7592, Univ. Paris-Diderot, 75013 Paris, France.

<sup>2</sup>Institut Systématique Évolution Biodiversité (ISYEB), Centre National de Recherche Scientifique, MNHN, Sorbonne Université, EPHE, 57 rue Cuvier, CP 50, 75005 Paris, France

<sup>3</sup>Janelia Research Campus, 19700 Helix Drive, Ashburn, Virginia 20147.

<sup>4</sup>Biology Department, University of North Carolina, Chapel Hill, USA.

<sup>5</sup>Laboratoire Evolution, Génomes, Comportement, Biodiversité (EGCE), CNRS, IRD, Univ. Paris-sud, Univ. Paris-Saclay, 91198 Gif-sur-Yvette, France.

<sup>6</sup>Lead Contact

\*Correspondence: [virginie.courtier@normalesup.org](mailto:virginie.courtier@normalesup.org), @Biol4Ever, +33 1 57 27 80 43

†current address: The Milner Centre for Evolution, Department of Biology and Biochemistry, University of Bath, Bath BA2 7AY, UK.

**One Sentence Summary:** We identify one nucleotide substitution in a gene regulatory region contributing to evolutionary change of two distinct copulatory organs.

### Highlights:

- We identify a gene and 3 substitutions causing genital evolution between species
- The evolved mutations lie in a pleiotropic enhancer
- One mutation decreases genital bristle number and increases leg sex comb tooth number
- This mutation disrupts a binding site for Abd-B in genitals and for another factor in legs

### SUMMARY

Diverse traits often covary between species. The possibility that a single mutation could contribute to the evolution of several characters between species is rarely investigated as relatively few cases are dissected at the nucleotide level. *Drosophila santomea* has evolved additional sex comb sensory teeth on its legs and has lost two sensory bristles on its genitalia. We found that a single nucleotide substitution in an enhancer of the *scute* gene contributes to both changes. The mutation alters a binding site for the Hox protein Abdominal-B in the developing genitalia, leading to bristle loss, and for another factor in the developing leg, leading to bristle gain. Our study shows that morphological evolution between species can occur through a single nucleotide change affecting several sexually dimorphic traits.

(125 words)

1 **Keywords:** pleiotropy, cis-regulatory, sensory organ, *Drosophila*, copulation, genitalia, hypandrium,  
2 sex comb, microevolution, *scute*, *Abd-B*

## 3 4 **RESULTS AND DISCUSSION**

5 “*Variability is governed by many unknown laws, of which correlated growth is probably the most*  
6 *important.*”[1]

7 Correlated evolution of traits is widespread among taxa [1,2] and can be due to pleiotropy, where a  
8 single locus causally affects several traits [3]. Pleiotropy imposes large constraints on the paths of  
9 evolution [4,5], making it crucial to assess the extent of pleiotropy to understand the evolutionary  
10 process. Empirical studies suggest that many loci influence multiple traits [3,6,7] and current data  
11 cannot reject the idea that all genetic elements have pleiotropic roles [3,8,9]. Several pleiotropic  
12 substitutions have been associated with natural variation [10–12, 12b]: most are coding changes and all  
13 underlie intraspecific changes ([www.gephebase.org](http://www.gephebase.org)). Nevertheless it remains unclear whether  
14 pleiotropic mutations contribute also to interspecific evolution, as experimental evidence suggests that  
15 the mutations responsible for interspecies evolution may be less pleiotropic than the mutations  
16 underlying intraspecific variation [13].

17 Here we focused on male sexual bristle evolution between *Drosophila yakuba* and *Drosophila*  
18 *santomea*, which diverged approximately 0.5-1 million years ago [14] and can produce fertile F1  
19 females in the laboratory [15], facilitating genetic mapping. We found that hypandrial bristles – two  
20 prominent mechanosensory bristles located on the ventral part of male genitalia in all *D. melanogaster*  
21 subgroup species – are missing in *D. santomea* males (Fig. 1). Examination of many inbred stocks and  
22 10 closely related species revealed that the absence of hypandrial bristles is a derived *D. santomea*-  
23 specific trait (Fig. 1, Tables S1-S2). No other genital bristle type was noticeably variable in number  
24 between *D. yakuba* and *D. santomea* (Fig. S1).

25 We performed whole-genome QTL mapping between *D. santomea* and *D. yakuba* and found  
26 that the left tip of chromosome X explains 44% of the variance in hypandrial bristle number in each  
27 backcross (confidence interval = 7 Mb for the *D. santomea* backcross and 2.6 Mb for the *D. yakuba*  
28 backcross, Fig. 2A). Duplication mapping in rare *D. santomea*-*D. melanogaster* hybrid males narrowed  
29 down the causal region to a 84.6 kb region of the *achaete-scute* complex (*AS-C*) (Fig. 2B-C, Table S2).

30 The *AS-C* locus contains four genes, but only two, *achaete* (*ac*) and *scute* (*sc*), are required for  
31 bristle formation [16]. Both genes are co-expressed, share *cis*-regulatory elements and act redundantly  
32 to specify bristles [17,18]. The elaborate expression pattern of *ac* and *sc* genes prefigures the adult  
33 bristle pattern and is controlled by numerous *cis*-regulatory elements [17]. We tested which of the two  
34 genes, *ac* or *sc*, contributes to loss of bristles using null mutants in *D. melanogaster*. All *ac*<sup>CAM1</sup> null  
35 mutant males had 2 hypandrial bristles (n=15) and *sc*<sup>M6</sup> null mutants had none (n=15) (Table S4),  
36 indicating that *sc* is required for hypandrial bristle development in *D. melanogaster*.

37 We detected 64 nucleotide differences in the *sc* coding region between *D. yakuba* and *D.*  
38 *santomea*, and all were synonymous substitutions, indicating that coding changes in *sc* are not  
39 responsible for the evolved function of *sc*. Using molecularly mapped chromosomal aberrations, we  
40 identified a 5-kb region located > 46 kb downstream of the *sc* promoter that is required in *D.*  
41 *melanogaster* for hypandrial bristle development (Fig. S2, Tables S3-4). Independently we screened 55  
42 *GAL4* reporter constructs tiling the entire *AS-C* locus and identified three *GAL4* lines (*15E09*, *054839*  
43 and *18C05*) that drive expression in hypandrial bristles (Fig. 2C, Tables S5-6). Only one of these lines,  
44 *18C05*, increased hypandrial bristle number with *UAS-scute* in a *sc* mutant background or in a *sc*<sup>+</sup>  
45 background (Fig. 2C, Fig. S3E-P). The 2036-bp *18C05* region is located within the 5-kb candidate  
46 region identified with *ac-sc* structural mutations (Fig. 2C), suggesting that *18C05* is a good candidate  
47 region for hypandrial bristle evolution.

1 To test whether loss of hypandrial bristles in *D. santomea* resulted from changes(s) in the  
2 *18C05 cis*-regulatory region, we assayed whether orthologous *18C05* regions from *D. melanogaster*,  
3 *D. yakuba* and *D. santomea* driving a *sc* coding region could rescue hypandrial bristles in a *D.*  
4 *melanogaster sc* mutant (Table S7-8). The *D. melanogaster 18C05* enhancer rescued two bristles in  
5 both *sc*<sup>29</sup> and *sc*<sup>M6</sup> mutant backgrounds, indicating that this construct mimics normal levels of *sc*  
6 expression. The *D. yakuba 18C05* enhancer rescued on average 2 hypandrial bristles in *sc*<sup>M6</sup> and 0.5  
7 bristles in *sc*<sup>29</sup> whereas the *D. santomea 18C05* enhancer rescued significantly fewer bristles (1.1 in  
8 *sc*<sup>M6</sup> and 0 bristles in *sc*<sup>29</sup>, Fig. 3). For another measure of *18C05* enhancer activity, we compared the  
9 ability of enhancer-*GAL4* constructs containing the *18C05* region from *D. melanogaster*, *D. yakuba* or  
10 *D. santomea* to induce extra bristles in *sc* mutants using the *UAS-GAL4* system with *UAS-sc*. In this  
11 assay the *D. santomea 18C05* region also induced fewer bristles than the corresponding *D. yakuba*  
12 region (Fig. 3, GLM-Quasi-Poisson, F(19, 509) = 161.7, p < 10<sup>-5</sup> for *sc*<sup>29</sup>; F(19, 415) = 125.9, p < 10<sup>-5</sup>  
13 for *sc*<sup>M6</sup>). Together, these results suggest that changes(s) within *18C05* contributed to hypandrial bristle  
14 evolution in *D. santomea*.

15 To narrow down the region responsible for hypandrial bristle loss, we dissected the *18C05*  
16 element from *D. melanogaster*, *D. yakuba* and *D. santomea* into smaller overlapping pieces and  
17 quantified their ability to produce hypandrial bristles with the *GAL4* rescue experiment. For all three  
18 species we found that smaller segments rescued significantly fewer bristles than the corresponding full  
19 region (Fig. S4-5). Thus, transcription factor binding sites scattered throughout the entire ~2 kb of the  
20 *18C05* element are required to drive full expression in the hypandrial bristle region.

21 Sequence alignment of the *18C05* region from multiple species revealed 11 substitutions and  
22 one indel that are fixed and uniquely derived in *D. santomea*. Among them, seven substitutions altered  
23 sites that are otherwise conserved in the *D. melanogaster* subgroup (Fig. S6-7). We tested the effect of  
24 these seven *D. santomea*-specific nucleotide changes by introducing them one at a time or all together,  
25 into either a *D. yakuba 18C05* enhancer or into the inferred ancestral enhancer driving *sc* expression  
26 (Tables S7-11). The ancestral *18C05* sequence was resurrected by reverting the *D. santomea*-specific  
27 and *D. yakuba*-specific mutations to their ancestral states and it produced the same number of bristles  
28 as the *D. yakuba* construct (Fig. 3, Fig. S8). Four substitutions (*G869A*, *T970A*, *T1008C* and *T1482C*)  
29 had no effect, whether in the *D. yakuba* or in the ancestral background (GLM-Quasi-Poisson, p>0.6).  
30 Three substitutions (*T1429G*, *A1507G* and *T1775G*) decreased the number of rescued bristles in both  
31 the *D. yakuba* and the ancestral sequence, and these effects were highly significant, except for *A1507G*  
32 in the *D. yakuba* background, which was slightly above statistical threshold (using the most stringent  
33 correction method) (Fig. 3). These results are consistent with analysis of smaller pieces of *18C05* and  
34 of *18C05* chimeric constructs containing DNA fragments from *D. yakuba* and *D. santomea* (Tables S7-  
35 11, Fig. S8). When combined into the *D. yakuba* background, the seven *D. santomea*-specific  
36 substitutions rescued the same number of bristles as the *D. santomea 18C05* construct (Fig. 3, Fig. S8,  
37 GLM-Quasi-Poisson, p>0.9 in *sc*<sup>M6</sup>). We conclude that at least three fixed substitutions within a 350-bp  
38 region located 49 kb away from *sc* contribute to the reduction in hypandrial bristle number in *D.*  
39 *santomea*.

40 Analysis of *18C05-GAL4* and *18C05-GFP* reporter constructs revealed that the *18C05* region  
41 drives expression not only in male genital discs [19] but also in male developing forelegs in the  
42 presumptive sex comb region [19b] where *sc* is broadly expressed (Fig. 4A-F). Sex combs are sensory  
43 organs used for grasping the female during copulation [20]. They differ in bristle number between *D.*  
44 *santomea* and *D. yakuba* (Fig. S9), and the difference maps to the X chromosome [21], where *sc* is  
45 located. These results prompted us to test whether the mutations contributing to hypandrial bristle  
46 evolution also affect sex combs. Significantly more GFP-positive cells were detected in the first tarsal  
47 segment at 5h after puparium formation (APF) with *18C05yakT1775G-GFP* than with *18C05yak-GFP*  
48 (GLM-Poisson, Chi-squared (20,2) deviance = 9.75, p = 0.033), suggesting that *T1775G* increases *sc*  
49 expression in the first tarsal segment. Sex comb tooth number was reduced in *sc*<sup>M6</sup> and *sc*<sup>6</sup> mutants and

1 significantly rescued with several *18C05-sc* constructs (Fig. 4J-K). Analysis of *sc<sup>M6</sup>* and *sc<sup>6</sup>* mutants  
2 rescued with the *yak18C05-sc* constructs containing the *D. santomea*-specific substitutions showed that  
3 *T1429G* and *T1507G* have no effect and that *T1775G* increases the number of sex comb teeth (Fig. 4J-  
4 K). We conclude that the *T1775G* substitution contributes to both the increase in sex comb tooth  
5 number and the loss of hypandrial bristles.

6 A bioinformatics search revealed that the *T1775G* substitution is predicted to alter a binding site  
7 for the Hox protein Abdominal-B (*Abd-B*) (Table S12). *Abd-B* is expressed only in the posterior part of  
8 the fly, where it directs the development of posterior-specific structures such as the genitalia [22]. We  
9 found that reducing *Abd-B* expression, using either genetic mutations or RNA interference, resulted in  
10 loss of hypandrial bristles (Fig. S10), indicating that normal levels of *Abd-B* expression are required for  
11 hypandrial bristle development. Electrophoretic mobility shift assays showed that *Abd-B* proteins bind  
12 more strongly to a 54-bp fragment of the *18C05* sequence containing the *D. yakuba*-specific T at  
13 position 1775 than the *D. santomea*-specific G at this position (Fig. S11). These results are consistent  
14 with the hypothesis that the *T1775G* substitution decreases *ABD-B* binding, contributing to reduction  
15 in *sc* expression levels, and ultimately reducing the number of hypandrial bristles. Since *Abd-B* is not  
16 expressed in developing legs, *T1775G* is expected to affect binding of other factors to increase sex  
17 comb tooth number. Overall, our study suggests that *T1775G* alters overlapping binding sites for  
18 distinct factors in the leg and the genitalia (Fig. 4K). All our analyses of the effects of individual  
19 substitutions have been carried out in *D. melanogaster* background. It is thus possible that the *18C05*  
20 enhancer represents only part of the effect of the *sc* locus on bristle divergence.

21 Intriguingly, the two organs affected by substitution *T1775G* – hypandrial bristles and sex  
22 combs – may both aid the male to position himself on top of the female during copulation [20,23].  
23 Genitals are the most rapidly evolving organs in animals with internal fertilization [24]. To our  
24 knowledge, only two other mutations contributing to the evolution of genital anatomy are known. First,  
25 a 61-kb-deletion of a cis-regulatory region of the *androgen receptor (AR)* gene in humans is associated  
26 with loss of keratinized penile spines in humans compared to chimpanzees [25]. Second, an amino acid  
27 change in the *nath10 acetyltransferase* gene which probably appeared recently in laboratory strains of  
28 the nematode *C. elegans*, alters morphology in the presence of some mutations but not in a wild-type  
29 genetic background [10]. Both mutations appear to be pleiotropic: the *AR* deletion is associated with  
30 loss of facial vibrissae in humans and the *nath10* mutation affects egg and sperm production as well.  
31 The paucity of known mutations responsible for genital evolution makes it currently difficult to  
32 propose general rules for the causes of rapid genital evolution. Our results are reminiscent of Mayr's  
33 pleiotropy hypothesis [26], which posits that certain characters may evolve arbitrarily as a result of  
34 selection on other traits due to pleiotropic mutations. In our case, whether the evolutionary change in  
35 sex comb tooth number or in genital bristle number has any effect on fitness is unknown.

36 We report here the first case of a cis-regulatory substitution between species with pleiotropic  
37 effects. Given the large number of bristle types regulated by *sc* (>100 in adult flies), it is possible that  
38 no cis-regulatory mutation in *sc* can affect only one bristle type. Our results challenge the idea that cis-  
39 regulatory enhancers are strict tissue-specific modules underlying evolutionary changes in targeted  
40 traits [27]. Even though cis-regulatory mutations may affect several tissues, it is probable that they still  
41 tend to be less pleiotropic than coding changes. Our results are thus compatible with the idea that cis-  
42 regulatory changes tend to have fewer pleiotropic effects than coding changes on average. Enhancer  
43 sequences evolve rapidly, with rapid turn over of individual binding sites while maintaining  
44 transcriptional output over millions of years by compensatory mutations [28]. Since pleiotropic  
45 mutations can have deleterious off-target effects, we propose that evolution of pleiotropic sites within  
46 enhancers should trigger the subsequent selection of compensatory mutations in cis, thus contributing  
47 to rapid divergence of cis-regulatory sequences. Overall, our results suggest that pleiotropic cis-  
48 regulatory mutations may play a more important role in evolution than previously thought.  
49

1  
2  
3  
4  
5  
6  
7  
8  
9  
10  
11  
12  
13  
14  
15  
16  
17  
18  
19  
20  
21  
22  
23  
24  
25  
26  
27  
28  
29  
30  
31  
32  
33  
34  
35  
36  
37  
38  
39  
40  
41

**Data and materials availability:** Sequences were deposited into GenBank (accession numbers MG460736-MG460765). Source data for Bristle Number and QTL mapping analysis are available as Auxiliary Supplemental Files.

**Supplemental Information includes:**

Figures S1-S11

Tables S1-S13

Supplemental References (29-63)

**ACKNOWLEDGEMENTS**

We thank the Tucson Drosophila Species Stock Center, the VDRC, Kyoto and Bloomington Stock Centers for flies. We thank São Tomé authorities for allowing us to collect flies. We thank S. Picard for help with MSG, E. Sánchez-Herrero for *Abd-B* flies, F. Schweisguth for *GFP-sc* flies, J. Selegue and S.B. Carroll for the *Abd-B* construct, L. Pintard and N. Joly for help in protein purification, R. Mann, S. Feng and G. Rice for EMSA suggestions, F. Mallard and T. Tully for advices on the statistical analyses, J. L. Villanueva-Cañas for help with JASPAR. We thank Q.D. Tran, M. Notin, V. Ludger, A. Matamoro-Vidal, C. Nobre, G. Verebes, S. El Ouisi, A. La, F. Foutel-Rodier, C. Guillard-Sirieix and A. Aydogan for their contributions and C. Desplan, D. Petrov, B. Prud'homme, A. Martin and J.A. Lepesant for comments on the manuscript. We acknowledge the ImagoSeine core facility of the Institut Jacques Monod, member of IBSA and France-BioImaging (ANR-10-INBS-04) infrastructures. We thank the Courtier-Orgogozo team for providing a stimulating environment and technical support.

**FUNDING**

The research leading to this paper has received funding from the European Research Council under the European Community's Seventh Framework Program (FP7/2007-2013 Grant Agreement no. 337579) to VCO, from the labex "Who am I?" (ANR-11-LABX-0071) funded by the French government through grant no. ANR-11-IDEX-0005-02 to AEP and from NIH (1R01GM121750) to DRM.

**AUTHOR CONTRIBUTIONS**

J.R.D. found that *D. santomea* lacks hypandrial bristles and that the trait difference is X-linked, D.L.S. genotyped flies with MSG, A.Y., I.N. and V.C.O. performed the QTL mapping experiment, D.R.M. made the *D. santomea-D. melanogaster* hybrids, I.N. dissected them, O.N. did all other fly crosses and dissected them, O.N., I.N., R.S. and A.E.P. phenotyped >3000 males for hypandrial bristles, O.N. phenotyped all other bristles, O.N. and M.L. did EMSA, O.N. and I.N. constructed the plasmids, O.N. performed immunostainings and microscopy, A.E.P. performed all statistical analyses with feedback from O.N. and M.L., D.R.M. collected wild flies, V.C.O. supervised research, performed bioinformatics sequence analysis and wrote the paper with O.N. All authors provided feedback on the text.

**DECLARATION OF INTEREST**

The authors declare no competing interests.

1

2

## REFERENCES

1. Darwin, C. (1859). On the origin of species by means of natural selection, or the preservation of favoured races in the struggle for life.
2. Saltz, J.B., Hessel, F.C., and Kelly, M.W. (2017). Trait Correlations in the Genomics Era. *Trends Ecol. Evol. (Amst.)* 32, 279–290.
3. Paaby, A.B., and Rockman, M.V. (2013). The many faces of pleiotropy. *Trends in Genetics* 29, 66–73.
4. Fisher, R.A. (1930). *The genetical theory of natural selection* (Oxford: Clarendon).
5. Orr, H.A. (2000). Adaptation and the cost of complexity. *Evolution* 54, 13–20.
6. Wagner, G.P., and Zhang, J. (2011). The pleiotropic structure of the genotype–phenotype map: the evolvability of complex organisms. *Nature Reviews Genetics* 12, 204–213.
7. Stearns, F.W. (2010). One Hundred Years of Pleiotropy: A Retrospective. *Genetics* 186, 767–773.
8. Lonfat, N., Montavon, T., Darbellay, F., Gitto, S., and Duboule, D. (2014). Convergent evolution of complex regulatory landscapes and pleiotropy at Hox loci. *Science* 346, 1004–1006.
9. Preger-Ben Noon, E., Sabarís, G., Ortiz, D.M., Sager, J., Liebowitz, A., Stern, D.L., and Frankel, N. (2018). Comprehensive Analysis of a cis -Regulatory Region Reveals Pleiotropy in Enhancer Function. *Cell Reports* 22, 3021–3031.
10. Duveau, F., and Félix, M.-A. (2012). Role of pleiotropy in the evolution of a cryptic developmental variation in *Caenorhabditis elegans*. *PLoS Biol.* 10, e1001230.
11. Chang, S.H., Jobling, S., Brennan, K., and Headon, D.J. (2009). Enhanced Edar Signalling Has Pleiotropic Effects on Craniofacial and Cutaneous Glands. *PLOS ONE* 4, e7591.
12. Kent, C.F., Daskalchuk, T., Cook, L., Sokolowski, M.B., and Greenspan, R.J. (2009). The *Drosophila* foraging Gene Mediates Adult Plasticity and Gene–Environment Interactions in Behaviour, Metabolites, and Gene Expression in Response to Food Deprivation. *PLOS Genetics* 5, e1000609.
- 12b. Endler, L., Gibert, J. M., Nolte, V., & Schlötterer, C. (2018). Pleiotropic effects of regulatory variation in tan result in correlation of two pigmentation traits in *Drosophila melanogaster*. *Molecular ecology*
13. Wittkopp, P.J., Haerum, B.K., and Clark, A.G. (2008). Regulatory changes underlying expression differences within and between *Drosophila* species. *Nature Genetics* 40, 346–350.
14. Turissini, D.A., and Matute, D.R. (2017). Fine scale mapping of genomic introgressions within the *Drosophila yakuba* clade. *PLoS Genetics* 13, e1006971.
15. Lachaise, D., Harry, M., Solignac, M., Lemeunier, F., Bénassi, V., and Cariou, M.L. (2000). Evolutionary novelties in islands: *Drosophila santomea*, a new melanogaster sister species from São Tomé. *Proc. Biol. Sci.* 267, 1487–1495.
16. Simpson, P., Woehl, R., and Usui, K. (1999). The development and evolution of bristle patterns in Diptera. *Development* 126, 1349–1364.
17. Gómez-Skarmeta, J.L., Rodríguez, I., Martínez, C., Culi, J., Ferrés-Marcó, D., Beamonte, D., and Modolell, J. (1995). Cis-regulation of achaete and scute: shared enhancer-like elements drive their coexpression in proneural clusters of the imaginal discs. *Genes Dev* 9, 1869–1882.

18. Marcellini, S., Gibert, J.-M., and Simpson, P. (2005). *achaete*, but not *scute*, is dispensable for the peripheral nervous system of *Drosophila*. *Dev. Biol.* *285*, 545–553.
19. Jory, A., Estella, C., Giorgianni, M.W., Slattery, M., Lavery, T.R., Rubin, G.M., and Mann, R.S. (2012). A Survey of 6,300 Genomic Fragments for cis-Regulatory Activity in the Imaginal Discs of *Drosophila melanogaster*. *Cell Reports* *2*, 1014–1024.
- 19b. Tanaka, K., Barmina, O., Sanders, L. E., Arbeitman, M. N., & Kopp, A. (2011). Evolution of sex-specific traits through changes in HOX-dependent doublesex expression. *PLoS biology*, *9*(8), e1001131.
20. Ng, C.S., and Kopp, A. (2008). Sex combs are important for male mating success in *Drosophila melanogaster*. *Behavior genetics* *38*, 195.
21. Coyne, J.A., Elwyn, S., Kim, S.Y., and Llopart, A. (2004). Genetic studies of two sister species in the *Drosophila melanogaster* subgroup, *D. yakuba* and *D. santomea*. *Genetics Research* *84*, 11–26.
22. Foronda, D., Estrada, B., de Navas, L., and Sánchez-Herrero, E. (2006). Requirement of Abdominal-A and Abdominal-B in the developing genitalia of *Drosophila* breaks the posterior downregulation rule. *Development* *133*, 117–127.
23. Hurtado-Gonzales, J.L., Gallaher, W., Warner, A., and Polak, M. (2015). Microscale Laser Surgery Demonstrates the Grasping Function of the Male Sex Combs in *Drosophila melanogaster* and *Drosophila bipectinata*. *Ethology* *121*, 45–56.
24. Eberhard, W.G. (1988). *Sexual Selection and Animal Genitalia* (Harvard University Press).
25. McLean, C.Y., Reno, P.L., Pollen, A.A., Bassan, A.I., Capellini, T.D., Guenther, C., Indjeian, V.B., Lim, X., Menke, D.B., Schaar, B.T., *et al.* (2011). Human-specific loss of regulatory DNA and the evolution of human-specific traits. *Nature* *471*, 216–219.
26. Mayr, E. (1963). *Animal species and evolution* (Harvard University Press).
27. Carroll, S.B. (2008). Evo-devo and an expanding evolutionary synthesis: a genetic theory of morphological evolution. *Cell* *134*, 25–36.
28. Cheng, Y., Ma, Z., Kim, B.-H., Wu, W., Cayting, P., Boyle, A.P., Sundaram, V., Xing, X., Dogan, N., Li, J., *et al.* (2014). Principles of regulatory information conservation between mouse and human. *Nature* *515*, 371.

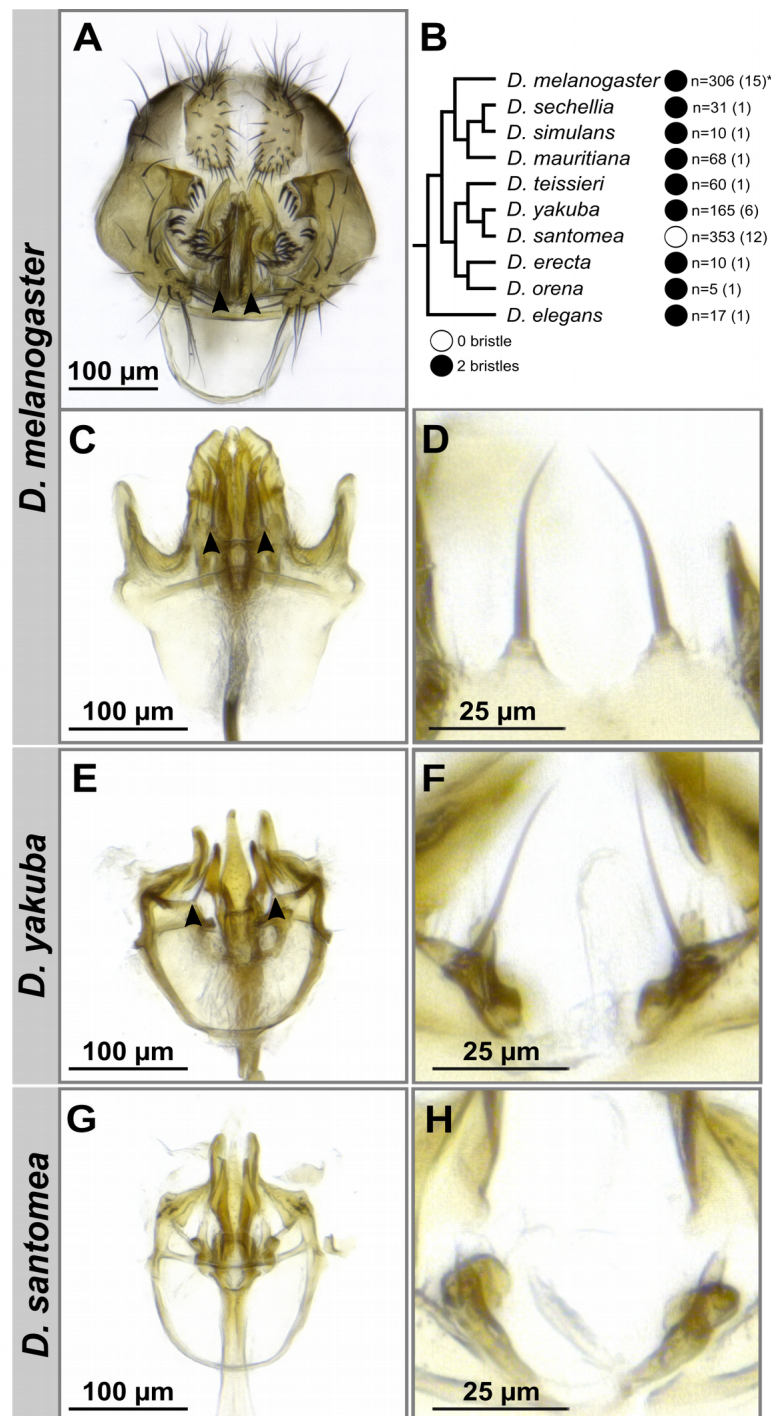

**Fig. 1. *D. santomea* lost hypandrial bristles.**

1 (A) *Drosophila melanogaster* male genitalia. (B) Phylogeny of the *Drosophila melanogaster* species  
 2 subgroup. All species of have two hypandrial bristles (black circles) except *Drosophila santomea*,  
 3 which lacks hypandrial bristles (white circle). n: number of scored males, with the number of scored  
 4 strains in parentheses. Asterisk indicates that 4 males out of 306 had three hypandrial bristles. (C-H)  
 5 Light microscope preparations of ventral genitalia (C,E,G) and hypandrial bristles (D,F,H) in *D.*  
 6 *melanogaster* (C-D), *D. yakuba* (E-F) and *D. santomea* (G-H). Hypandrial bristles are indicated with  
 7 arrowheads on A, C and E.



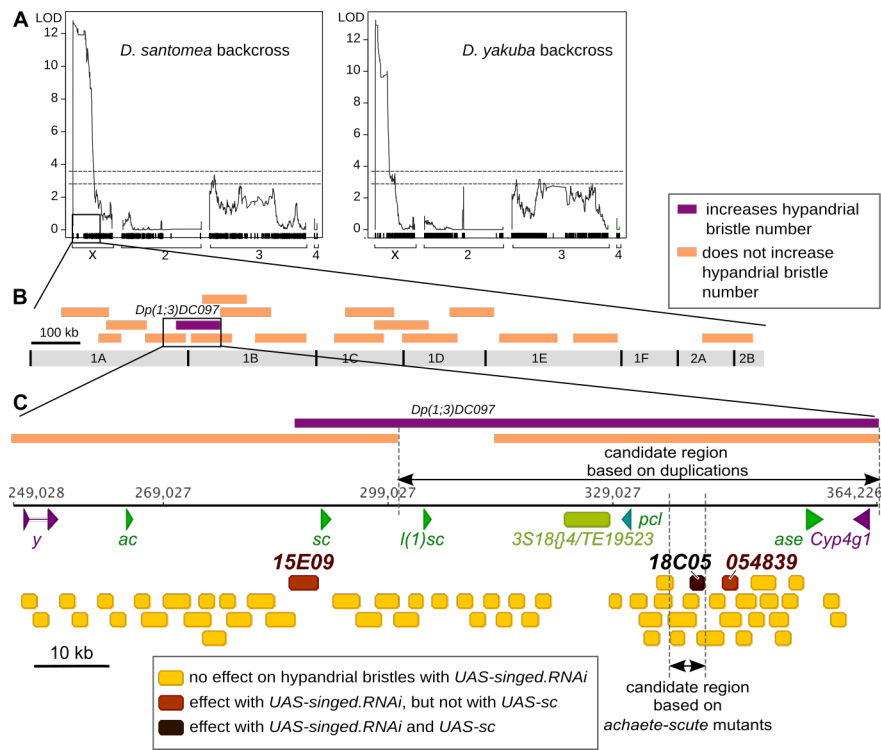

## Fig. 2. Mapping of the cis-regulatory element involved in hypandrial bristle evolution.

(A) QTL analysis of hypandrial bristle number in a *D. santomea* backcross (left) and a *D. yakuba* backcross (right). On the y-axis are the LOD profiles from a Haley-Knott regression analysis. The x-axis represents physical map position in the *D. yakuba* genome. Ticks represent recombination informative markers. Dotted lines represent the 1% (top) and 5% (bottom) significance thresholds. (B) Schematic representation of the left tip of chromosome X and of 19 duplicated fragments of chromosome X that were tested for their effect on hypandrial bristle number in *D. santomea-D. melanogaster* hybrid males. All duplications had no significant effect (orange) except *Dp(1;3)DC097* (purple), which significantly increased hypandrial bristle number. (C) Genomic organization of the *AS-C* locus in *D. melanogaster*. Arrows indicate the coding regions of *yellow* (*y*), *achaete* (*a*), *scute* (*sc*), *lethal of scute* (*l(1)sc*), *pepsinogen-like* (*pcl*), *asense* (*ase*) and *cytochrome P450-4g1* (*Cyp4g1*) genes. The light green box represents the insertion of a *3S18{4}/TF9523* natural transposable element. Boxes indicate cis-regulatory elements whose corresponding *GAL4* reporter lines have been tested. Expression of *UAS-singed.RNAi* with 52 *GAL4* lines (yellow boxes) has no effect while it results in singed hypandrium bristles with *15E09*-, *18C05*- and *054839-GAL4*. Extra hypandrial bristles are found with *UAS-sc* and *18C05-GAL4* (dark brown box) but not with *15E09*- and *054839-GAL4* (light brown boxes).

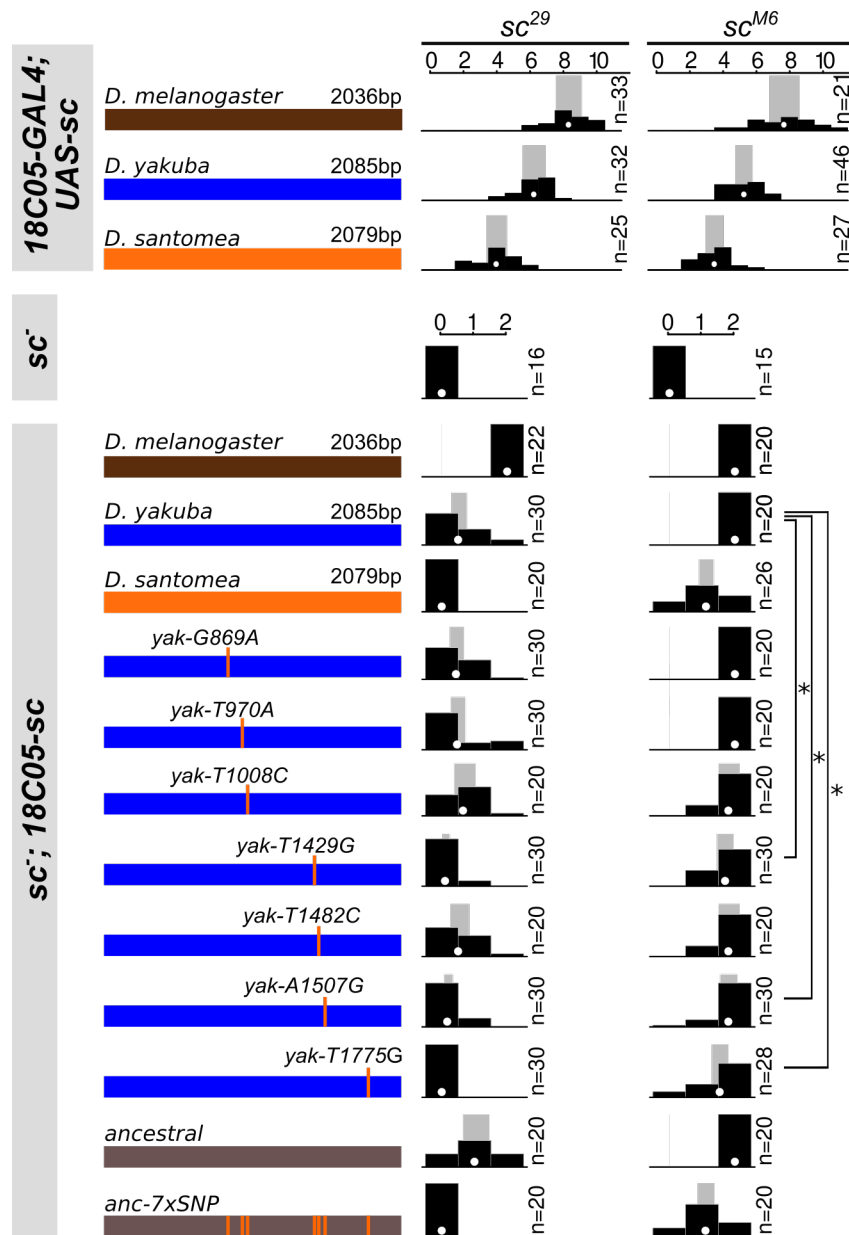

2 **Fig. 3. Three *D. santomea*-specific substitutions in *18C05* contribute to the loss of hypandrial**  
 3 **bristles.**

4 Rescue of the hypandrial bristle loss of  $sc^{29}$  (left column) and  $sc^{M6}$  (right column) *D. melanogaster*  
 5 mutants by expression of either *GAL4* with *UAS-sc* or *sc* driven by *18C05* sequences from *D.*  
 6 *melanogaster* (brown), *D. yakuba* (blue) and *D. santomea* (orange). Seven *D. santomea*-specific  
 7 substitutions (vertical orange bars) were introduced into either the *D. yakuba* region (blue) or the  
 8 ancestrally reconstructed *18C05* region (grey). Distribution of hypandrial bristle number (black  
 9 histogram), together with mean (white dot) and 95% confidence interval (grey rectangle) from a fitted  
 10 GLM Quasi-Poisson model are shown for each genotype. Note that for a given rescue construct,  
 11 *18C05-GAL4 UAS-sc* produces more hypandrial bristles than *18C05-sc*, probably due to the  
 12 amplification of gene expression caused by the *GAL4/UAS* system. n: number of scored individuals. \*:   
 13  $p < 0.05$

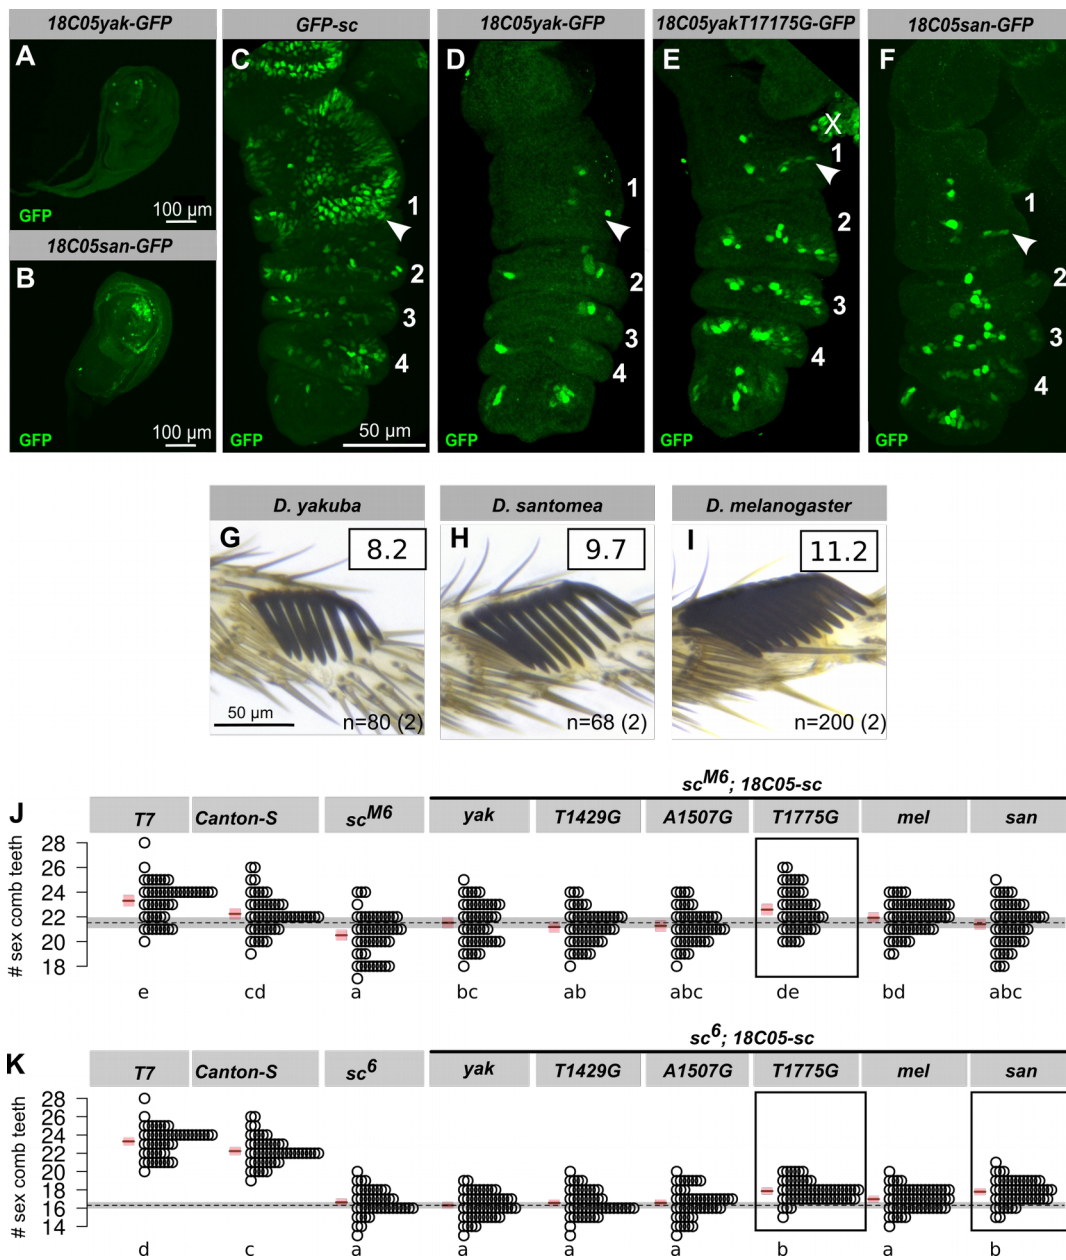

**Fig. 4. *D. santomea*-specific substitution T1775G contributes to increase in sex comb tooth number.**

2  
3

1 (A-F) *18C05* drives expressionGFP staining in T1 leg discs of late L3 larvae (A-B) and in 5h APF  
2 pupal legs (C-F) in *D. melanogaster*. Genotype is indicated on top of each panel. Tarsal segments are  
3 numbered. Arrowheads point to the presumptive sex comb regions. “X” indicates non-leg tissue. late  
4 L3 larvae containing either *18C05yakuba-GFP* (A-C) or *18C05santomea-GFP* (D-F) transgenes. GFP  
5 is labeled in green (A, C, D, F), DNA is shown in blue (B, C, E, F). (G-I) Leg sex comb in *D. yakuba*  
6 (G), *D. santomea* (H) and *D. melanogaster* (I). Average sex comb tooth numbers per leg are shown in  
7 squares. n: number of scored individuals, with the number of scored strains in parentheses. (J-K) Sex  
8 comb tooth number in wild-type (T7 and Canton-S), *sc<sup>M6</sup>* (J) and *sc<sup>6</sup>* (K)*sc<sup>M6</sup>* mutants and *sc<sup>M6</sup>* (J) and  
9 *sc<sup>6</sup>* (K) and *sc<sup>M6</sup>* mutants rescued with different *18C05-sc* constructs, . Each circle represents one male  
10 raised at 25°C. Mean (brown line) and 95% confidence interval (pink rectangle) from a fitted GLM  
11 Quasi-Poisson model are shown. Letters indicate the results of all-pairwise comparisons after Holm-  
12 Bonferroni correction. Two genotypes are significantly different from each other ( $p < 0.05$ ) when they  
13 do not share a letter. For easier comparison, the horizontal dashed line and the  
14 surrounding grey line indicate the mean and 95% confidence interval for *sc<sup>6</sup>;18C05yak-sc*. Transgenic  
15 constructs with sex comb tooth number significantly different from 18C05ak-sc are shown in boxes in  
16 J-K. On average *D. santomea* males have about 1 extra tooth per sex comb compared to *D. yakuba* (G-  
17 H) and 35% of this difference has been attributed to the X chromosome [21]. The substitution *T1775G*  
18 produces on average 0.5 extra sex comb tooth per leg, which is more than expected. It is possible that  
19 the *D. melanogaster* background, where all our rescue constructs were tested, amplifies the effect of the  
20 tested substitutions, especially since *D. melanogaster* males have more sex comb teeth than *D.*  
21 *santomea* or *D. yakuba*.

22  
23  
24

## 1 STAR\*METHODS

## 4 CONTACT FOR REAGENT AND RESOURCE SHARING

5 Further information and requests for resources and reagents should be directed to and will be fulfilled  
6 by the Lead Contact, Virginie Courtier-Orgogozo ([virginie.courtier@normalesup.org](mailto:virginie.courtier@normalesup.org)).

## 8 EXPERIMENTAL MODEL AND SUBJECT DETAILS

9 The origin of all the fly strains used can be found in Tables S1,3,5-6. All flies were cultured on standard  
10 cornmeal–agar medium in uncrowded conditions at 25°C unless stated. We used *Canton-S* as a wild-  
11 type *D. melanogaster* strain. Transgenic constructs were integrated into the *attP2* landing site in *D.*  
12 *melanogaster* *w<sup>1118</sup>* by BestGene Inc. Hybrid males between *D. yakuba* and *D. santomea* were obtained  
13 by collecting 20 virgin females with 20 males from each stocks and crossing them reciprocally in both  
14 directions. At least 10 such crosses were made and flipped every 4-5 days for several weeks. For QTL  
15 mapping, *D. yakuba* *yellow[1]* virgin females were crossed *en masse* to *D. santomea* SYN2005 males  
16 to generate F1 hybrid females, which were subsequently backcrossed, separately, to both parental  
17 strains. Genitalia of backcross males were isolated for dissection and the remaining carcass was stored  
18 at -20 °C for subsequent sequencing library preparation.

## 21 METHOD DETAILS

### 23 Genotyping of backcross males for QTL mapping

24 The carcass of each male was crushed in a 1.5-ml Eppendorf tube with a manual pestle in 180 µl of  
25 Qiagen Tissue Lysis buffer. DNA of individual flies was extracted using Qiagen DNeasy Blood &  
26 Tissue extraction kit (cat #69506). A Multiplexed Shotgun Genotyping sequencing library was made  
27 from 189 *D. santomea* backcross males and for 181 *D. yakuba* backcross males as described previously  
28 [29]. The list of barcodes used in this study are provided in Supplemental Data File 1, within the names  
29 of the individuals that were sequenced. *D. yakuba* and *D. santomea* parental genome sequences were  
30 generated by updating the *D. yakuba* genome sequence *dyak-4-chromosome-r1.3.fasta* with Illumina  
31 paired-end reads from *D. yakuba* *yellow[1]* and *D. santomea* SYN2005 (sequenced by BGI) using the  
32 *msgUpdateParentals.pl* function of the MSG software package. The resulting updated genome files are  
33 *dsan-all-chromosome-yak1.3-r1.0.fasta.msg.updated.fasta* and *dyak-4-chromosome-*  
34 *r1.3.fasta.msg.updated.fasta*. Ancestry was estimated for all backcross progeny using MSG software  
35 ([github.com/YourePrettyGood/msg](https://github.com/YourePrettyGood/msg)). Ancestry files were reduced to only those markers informative for  
36 recombination events using the script *pull\_thin\_tsv.py* ([github.com/dstern/pull\\_thin](https://github.com/dstern/pull_thin)). Markers were  
37 considered informative when the conditional probability of being homozygous differed by more than  
38 0.05 from their neighboring markers.

### 40 QTL mapping

41 QTL mapping was performed using the R/*qtl* package version 1.4 [30,31]. The thinned posterior  
42 genotype probabilities were imported into R/*qtl* using the R function *read.cross.msg.1.5.R*  
43 ([github.com/dstern/read\\_cross\\_msg](https://github.com/dstern/read_cross_msg)). QTL mapping was performed independently on each backcross

1 population. We performed genome scans with a single QTL model (“scanone”) using the Haley-Knott  
2 regression method [32] performs well with genotype information at a large number of positions along  
3 the genome. The genome-wide 5% and 1% significance levels were determined using 1,000  
4 permutations. One QTL peak above the 1% significance level was found for both backcrosses. To  
5 check for additional QTL, we built a QTL model with this single QTL using the “fitqtl” function and  
6 scanned for additional QTL using the “addqtl” function. A second QTL was found on chromosome 3  
7 for both backcrosses. When introduced into a new multiple QTL model, refined and fitted to account  
8 for possible interactions, a third significant QTL was found. Based on the full three-QTL model, no  
9 additional significant QTL were found with the function “addqtl”: the highest LOD score for a fourth  
10 QTL reached only 1.8 and 1.2 for the *D. yakuba* backcross and the *D. santomea* backcross,  
11 respectively. Various three-QTL models with different interactions between loci were assessed. Positive  
12 significant interaction was detected between the QTL on chromosome 1 and both QTLs on  
13 chromosome 3. The interaction between the two QTLs on chromosome 3 was not significant. For the  
14 three-QTL model with interactions between the QTL on chromosome 1 and both QTLs on chromosome  
15 3, we computed the LOD score of the full model and the estimated effects of each locus. The 2-LOD  
16 intervals were calculated using the “lodint” function with parameter drop of 2. Analysis of F1 hybrid  
17 males is consistent with a large effect of the X chromosome on hypandrial bristle number: male F1  
18 hybrids carrying a *D. yakuba* X chromosome have on average 1.9 hypandrial bristles (n=34) while  
19 reciprocal hybrid males possessing the *D. santomea* X chromosome have none (n=29) (Table S2). Note  
20 that few informative markers are found on the right arm of chromosome 2, suggesting the presence of  
21 an inversion between parental lines. In both backcrosses the large-effect QTL is estimated to cause a  
22 decrease of  $0.9 \pm 0.1$  bristles between a *D. yakuba* hemizygote and a *D. santomea* hemizygote male  
23 (Data S1). The QTL peak is at position 46,886 and 221,928 for the *D. santomea* and *D. yakuba*  
24 backcross, respectively. The *AS-C* locus is at position 179,000-290,000.  
25

### 26 Duplication Mapping in *D. santomea*-*D. melanogaster* hybrids

27 We used a set of *D. melanogaster* duplication lines to test overlapping parts of chromosome X for their  
28 effect on hypandrial bristle number [33]. Each line contains a fragment of the chromosome X inserted  
29 into the same attP docking site on chromosome 3L using  $\Phi$ C31 integrase, allowing direct comparison  
30 between fragments. Each duplication was used to screen for complementation of the loss of function  
31 allele(s) from *D. santomea*. We exploited the fact that rare *D. santomea*-*D. melanogaster* hybrid males  
32 can be produced by crossing *D. melanogaster* females carrying a compound X chromosome with *D.*  
33 *santomea* males [34]. The resulting hybrid males carry a *D. santomea* X chromosome. We first created  
34 a *D. melanogaster* stock whose genotype is *TM3, Sb[1] Ser[1]/Nup98-96[339]* by crossing *Nup98-*  
35 *96[339]/TM3, Sb[1]* with *Df(3R)D605/TM3, Sb[1] Ser[1]*. We then performed three successive crosses  
36 at room temperature in glass vials: (a) *C(1)RM, y[1] w[1] f[1]* ;  $+/+ \times +/+$ ; *TM3, Sb[1] Ser[1]/Nup98-*  
37 *96[339]*, (b) *C(1)RM, y[1] w[1] f[1]* ; *TM3, Sb[1] Ser[1]/+ \times +/Y; Dp(1,3)/Dp(1,3)*, (c) *C(1)RM, y[1]*  
38 *w[1] f[1]* ; *TM3, Sb[1] Ser[1]/Dp(1,3)* *D. melanogaster* females  $\times$  *D. santomea* males. The same  
39 procedure was followed for 21 duplication lines and progeny was obtained for 17 of them. Hybrid  
40 males from the last cross were sorted in two pools, the [*Sb*<sup>-</sup>, *Ser*<sup>-</sup>] males who carried the duplication and  
41 the [*Sb*<sup>+</sup>, *Ser*<sup>+</sup>] males which were used as controls which carried no duplication but the balancer  
42 chromosome *TM3 Sb[1] Ser[1]*. In *D. melanogaster/D. santomea* hybrids, dominant markers are not  
43 always fully penetrant. A few progeny males exhibited [*Sb*<sup>+</sup>, *Ser*<sup>-</sup>] or [*Sb*<sup>-</sup>, *Ser*<sup>+</sup>] phenotypes; they were  
44 considered as control individuals carrying the balancer chromosome *TM3, Sb[1] Ser[1]*. Males were  
45 stored in ethanol until dissection. Duplication mapping narrowed down the causal region to a 84.6 kb  
46 region (*DC097*) of the *achaete-scute* complex (*AS-C*) (Fig. 2.B-C, Table S2, GLM-Poisson,  
47  $\text{Chisq}(17,478)=398.44$ ,  $p = 10^{-4}$ ).  
48

## 1 Examination of Hypandrial Bristle Phenotypes

2 Male genitalia were cut with forceps and then hypandria were dissected with fine needles or  
3 forceps Dumont #5 (112525-20, Phymep) in a drop of 1x PBS. For *D. melanogaster* in order to see the  
4 hypandrial bristles better we removed the aedeagus by holding the aedeagal apodem with forceps and  
5 gently pushing the hypandrium upwards with an other forceps until it separated. Hypandria were  
6 mounted in DMHF (Dimethyl Hydantoin Formaldehyde, Entomopraxis). Before dissection, males were  
7 sometimes stored at -20°C in empty Eppendorf tubes or in glycerol:acetate:ethanol (1:1:3) solution. For  
8 analysis of non-hypandrial bristles, males were stored at -20°C in glycerol:acetate:ethanol (1:1:3)  
9 solution. We never stored these males in empty tubes because we found that such a storage procedure  
10 can break and remove external bristles (but, as far as we know, hypandrial bristles were not affected by  
11 such a procedure, maybe because hypandrial bristles are relatively internal and protected by the  
12 epandrium). Furthermore, we never observed a single socket devoid of shaft on the male hypandrium,  
13 indicating that hypandrial bristles cannot be accidentally cut or lost with our experimental protocol. 3D  
14 projection images of the preparations were taken at 500X magnification with the Keyence digital  
15 microscope VHX 2000 using optical zoom lens VH-Z20R/W.  
16

## 17 Examination of Other Bristles

18 Since genitalia are the most rapidly evolving organs in animals with internal fertilization [32], we  
19 compared the number of genital bristles between two strains of *D. yakuba* and two strains of *D.*  
20 *santomea*. We found no difference between *D. yakuba* and *D. santomea* in any genital bristles except  
21 for anal plate and clasper bristles, where a slightly significant interspecific variation was detected (Fig.  
22 S1.). The loss of hypandrial bristles in *D. santomea* is thus the major change in genital bristles between  
23 *D. santomea* and *D. yakuba*. Genitalia were dissected in 1X PBS, hypandria were removed and the  
24 epandria were mounted in 99% glycerol. Gentle pressure was applied on the cover-slip with forceps to  
25 flatten the preparations in order to see all bristles. Pictures were taken at a 500X magnification with a  
26 digital microscope VHX 2000 (Keyence) using lens VH-Z20R/W. Bristles were counted on the images.  
27 For sex comb preparations, prothoracic legs were dissected at the coxa with forceps Dumont #5 and  
28 were mounted in DMHF (Dimethyl Hydantoin Formaldehyde, Entomopraxis). Images of the sex combs  
29 were taken at 1000x magnification with the Keyence digital microscope as written above. Sex comb  
30 teeth were counted on the images with Image J [35].  
31

## 32 Analysis of *scute* coding sequence

33 The *scute* coding sequence (CDS) of *D. melanogaster* iso-1 was retrieved from FlyBase. We  
34 blasted the updated genome sequences of *D. yakuba* *yellow*[1] and *D. santomea* SYN2005 (see above)  
35 with *D. melanogaster* *scute* coding region and retrieved only one locus in each species. The *scute*  
36 coding region was then annotated with Geneious and no intron was found, as in *D. melanogaster*.  
37

## 38 Screening *as-GAL4* lines for expression in the hypandrium

39 The *as-GAL4* lines were ordered from VDRC and Bloomington Stock Center (Table S6). Two lines  
40 were not available (*GMR1509* and *VT054822*) so we created new transgenic lines for these regions,  
41 named *GMR15X09-GAL4* and *VT054822b-GAL4* (see below). Because screens are easier on adults  
42 than on genital discs, and also because the exact developmental stage and location of hypandrial bristle  
43 development are unknown [36], we decided to look for GAL4-triggered phenotypes in adult males. As  
44 a readout of GAL4 expression, we tested various UAS lines (*UAS-mCD8-GFP*, *UAS-yellow* in a yellow  
45 mutant background, *UAS-sc.RNAi*, *UAS-achaete.RNAi*, *UAS-forked.RNAi*, *UAS-singed.RNAi*) (lines  
46 are listed in Table S1 and S5) together with *DC-GAL4*, which drives expression in the dorso-central  
47 thoracic bristles [37]. To enhance RNAi potency we also used *UAS-Dicer-2* (35). With *UAS-mCD8-*  
48 *GFP* and *UAS-yellow* the change in fluorescence or color was hardly visible. The most penetrant bristle

1 phenotype was obtained with *UAS-Dicer-2 UAS-singed.RNAi*<sup>105747</sup> at 29 °C (Table S5). Therefore this  
2 line was chosen for screening all the *as-GAL4* constructs.

3 Five *as-GAL4* males of each *as-GAL4* line were crossed to five *Dcr2; UAS-singed*<sup>105747</sup>.*RNAi/CyO*  
4 virgin females. Crosses were kept at 29 °C. The non-curly males (*Dcr2; UAS-singed*<sup>105747</sup>.*RNAi/+;*  
5 *+/as-GAL4*) were collected for dissection and kept at -20 °C. Hypandrium dissection and image  
6 acquisition were performed as indicated above. For each *as-GAL4* line at least 5 genitalia were  
7 examined (Table S6).

8 To test whether the *15E09*, *18C05* and *054839* enhancer-*GAL4* drive expression in the hypandrial  
9 bristle region in absence of *sc*, we crossed five *sc*<sup>29</sup>; *UAS-scute (III)* females with five males of each  
10 respective *GAL4* line, as well as five *sc*<sup>M6</sup>/*FM7*; *UAS-scute (III)* females with five males of each  
11 respective *GAL4* line. Of the three *GAL4* lines, only *18C05* could induce hypandrial bristles with *UAS-*  
12 *sc* in a *sc* mutant background. The *18C05-GAL4* line produced approximately 10 bristles, where  
13 normally only two develop, which may reflect the amplification of gene expression that is inherent to  
14 the *UAS-GAL4* system. These results suggest that only *18C05* drives sufficiently strong expression in  
15 the hypandrial region to alter bristle patterning.

### 16 Cloning of enhancers into pBPGUw and pBPSUw

17 Enhancers were cloned into the *GAL4* reporter vector pBPGUw using the same strategy as in [37,38].  
18 Enhancer sequences were amplified by Phusion® High Fidelity Polymerase (New England Biolabs) in  
19 two steps reaction using the primers and templates listed in Table S7, S8 and S9. PCR products and  
20 vectors were purified by Nucleospin Gel and PCR Clean-Up Kit (Machery-Nagel). Clones were  
21 purified by E.Z.N.A.® Plasmid Mini Kit I (Omega Bio-tek). All *GAL4* constructs were cloned using  
22 the Gateway® system (ThermoFisher Scientific). The enhancer fragments were first ligated into  
23 *KpnI* and *HindIII* restriction enzyme site of the vector pENTR/D-TOPO (Addgene) (Table S8).  
24 Recombination into the destination vector pBPGUw was performed using LR clonase II enzyme mix  
25 (Invitrogen) and products were transformed into One Shot® TOP10 (Invitrogen) competent cells.  
26 Recombinant clones were selected by ampicillin resistance on Amp-LB plates (100 µg/ml)  
27

28 The pBPSUw vector was constructed by replacing the *GAL4* cassette of pBPGUw by *scute* CDS.  
29 The *scute* CDS was amplified from *D. melanogaster iso-1* with Scute-CDS-Rev and Scute-CDS-For  
30 primers and ligated into pGEM-T Easy (Promega). The *sc-CDS* insert was cut out using *KpnI* and  
31 *HindIII* and cloned into *KpnI* and *HindIII* sites in pBPGUw, thus replacing *GAL4*. The vector was  
32 named pBPSUw where “S” stands for *scute*. *18C05* sequences from *D. melanogaster*, *D yakuba* and *D.*  
33 *santomea* were cloned into pBPSUw and tested in rescuing hypandrial bristles in *sc* mutants as written  
34 above. We found that *18C05* from *D. melanogaster* rescued two hypandrial bristles in both *sc*<sup>29</sup> and  
35 *sc*<sup>M6</sup> mutants. *D. santomea 18C05* enhancer rescued fewer hypandrial bristles on average than the *D.*  
36 *yakuba 18C05* region (Fig. 3., bristle number for *D. yakuba 18C05* in *sc*<sup>29</sup> is significantly different from  
37 0 (Exact-Poisson,  $p < 10^{-16}$ ) and bristle number for *D. santomea 18C05* in *sc*<sup>M6</sup> is significantly different  
38 from 2 (Exact-Poisson,  $p = 0.0008$ )).

39 The *18C05* full length sequences were amplified by PCR from *D. melanogaster iso-1*(BL2057), *D.*  
40 *melanogaster T-7*, *D. yakuba Ivory Coast* and *D. santomea SYN2005* with the primers listed in Table  
41 S7. The PCR products were cloned into pBPSUw as described above. Three different *D. melanogaster*  
42 *18C05* sequences were tested with *UAS-sc* in the hypandrium in *sc*<sup>29</sup> and *sc*<sup>M6</sup>. *GMR-18C05* (BL2057)  
43 was obtained from the Janelia Farm collection [38] and *18C05 BL2057* and *18C05 T7* were cloned in  
44 this study. Hypandrial bristle number was found to be significantly higher for *GMR-18C05* than for  
45 *18C05 BL2057* and *18C05 T7* in both backgrounds (GLM-Quasi-Poisson,  $F(2, 63) = 16.88$ , both  $p <$   
46  $10^{-6}$  for *sc*<sup>29</sup>;  $F(2, 58) = 20.9$ ,  $p < 10^{-10}$  and  $p < 10^{-5}$  for *sc*<sup>M6</sup>). The *GMR-18C05* fragment is inserted in  
47 the expression vector 3'-5' compared to the *D. melanogaster* genome sequence. In contrast, the  
48 *18C05 BL2057* and *18C05 T7* are cloned 5'-3'. All the *18C05* constructs we made were inserted in the  
49 same orientation, 5'-3'. *GMR-18C05* and *18C05 BL2057* are the same sequences (from *D.*



1 *melanogaster* Bloomington Stock Center Strain #2057), but cloned in opposite directions. *18C05\_T7*  
2 contains the *18C05* sequence of *D. melanogaster* T.7 strain. Comparing bristle number between *GMR-*  
3 *18C05-GAL4* and *18C05\_BL2057-GAL4* shows that the orientation of the cis-regulatory region has an  
4 effect on bristle number.

5 The *18C05-chimera-pBPSUw* constructs were cloned using Gibson Assembly [39] by fusing together  
6 different lengths of *18C05* sequences from *D. yakuba* Ivory Coast and *D. santomea* SYN2005. The  
7 different chimeras are listed in Table S9. Cloning primers were designed using NEBuilder Tools  
8 (<http://nebuilder.neb.com/>). Primer sequences and templates used in PCR are listed in Tables S7 and  
9 S9. To assemble the *18C05* fragments in pBPSUw (Table S10), the vector was linearized by *AatII* and  
10 *FseI* restriction enzymes (New England Biolabs Inc.). After digestion thermosensitive alkaline  
11 phosphatase (FastAP, ThermoFisher Scientific) was added to the reaction to prevent self-ligation of the  
12 plasmid. PCR products and the linearized plasmid were isolated from 1% agarose gels and spin column  
13 purified. Gibson Assembly was performed as in [39], except that the assembly reactions were incubated  
14 at 37 °C for 10 minutes and then 3 hours at 50 °C in a PCR machine. 2 µl of assembly mixtures were  
15 transformed into NEB® 10-beta (New England Biolabs Inc.) competent cells and ampicillin-resistant  
16 colonies were selected on 100 µg/ml Amp-LB plates. The Gibson Assembly Master-mix was prepared  
17 according to [39], its components were purchased from Sigma-Aldrich.

18 The *18C05-yakubaSNP-pBPSUw* constructs were cloned by Gibson Assembly as described above,  
19 except for *18C05yakT1008C* and *18C05yakT1482C* sequences, which were synthesized and cloned by  
20 GenScript® (Table S11). The *18C05-ancestral* sequences were synthesized and cloned by GenScript®  
21 into pBPSUw *AatII* and *FseI* sites, except for the *18C05\_AncG869A*, *18C05\_AncT670G* and  
22 *18C05\_Anc-7SNP* sequences, which were cloned by us by Gibson Assembly into pBPSUw *AatII* and  
23 *FseI* sites using the *18C05\_Ancstral\_Gibson\_forward* and *18C05\_Ancstral\_Gibson\_reverse* primers  
24 (Tables S7 and S10).

25 All transgenic constructs were integrated into the *attP2* landing site in *D. melanogaster* *w<sup>1118</sup>* by  
26 BestGene Inc. The *T1775G* substitution affects nucleotide position 447,055 in the Dm6 reference  
27 assembly.

### 28 Genomic DNA preparations for sequencing the *18C05* region

29 Genomic DNA was isolated with Zymo Research Quick-DNA™ Miniprep Plus Kit from 3 males  
30 and 3 females from the *D. yakuba*, *D. santomea* and *D. teissieri* lines listed in Table S12. *18C05*  
31 sequences were amplified with *San-Yak\_lines\_sequencing-For* and *San-Yak\_lines\_sequencing-Rev*  
32 primers (Table S7) using Phusion® High Fidelity Polymerase (New England Biolabs).  
33  
34

### 35 Sequence Analysis

36 Geneious software was used for cloning design and DNA sequence analysis. Nucleotide positions are  
37 given according to the alignment of *D. yakuba* Ivory Coast *18C05* sequence with *D. santomea*  
38 SYN2005 *18C05* sequence. The *18C05ancestral* sequence of *D. yakuba* and *D. santomea* was  
39 reconstructed in Geneious based on the *18C05* sequence alignment of *Drosophila* lines listed in Table  
40 S12. Manual parsimony reconstruction of all the ancestral nucleotides was unambiguous, except for  
41 one position (766, indel polymorphism), where the sequence is absent in the *simulans* complex and in  
42 *D. santomea*, while it is present in *D. teissieri* and polymorphic in *D. yakuba*. For this position we  
43 chose *D. teissieri* as the ancestral sequence. The *18C05* sequences of *D. melanogaster* subgroup  
44 species were retrieved by BLAST from the NCBI website. Transcription Factor (TF) binding sites in  
45 *18C05* were predicted using the JASPAR CORE Insecta database (<http://jaspar.genereg.net> [40]). 25-60  
46 bp sequences of *18C05* were scanned with all JASPAR matrix models with 50-95% Relative Profile  
47 Score Thresholds to test for sensitivity and selectivity [40] (Table S12). For TFs which were absent in  
48 JASPAR (Scute), we used Fly Factor Survey to analyze their putative binding affinities to the probe. As  
49 *sc* cis-regulatory region is known to contain binding sites for Scute itself [41], we looked for Scute

1 binding sites in *18C05*, *15E09* and *054839*. Two putative Scute binding sites (consensus motif  
2 *CAYCTGY*, Fly Factor Survey [41]) were found in *15E09* and *054839* but not in *18C05*. Given the  
3 present results, we cannot exclude the involvement of *15E09* and *054839* in the evolution of hypandrial  
4 bristle evolution in *D. santomea*. In this paper, we decided to focus on the *18C05* enhancer, whose  
5 effect could be studied in a *sc* mutant background.  
6

### 7 Statistical Analyses

8 Since bristle number is a classical type of count data, we performed statistical analysis using  
9 generalized linear models (GLM) and generalized linear mixed models (GLMM) where bristle number,  
10 the response variable, is assumed to follow a Poisson distribution [42–44]. All statistical analyses were  
11 performed using R 3.4 [45]. GLM were fitted with the function `glm()` ("stats" core package 3.5.0) and  
12 GLMM with the function `glmer()` ("lme4" package 1.1-14 [46] with the parameter "family" taken to be  
13 "Poisson". We tested differences in bristle number by comparing two wild-type stocks of *D. yakuba*  
14 with two wild-type stocks of *D. santomea*. We tested the difference between species, using a GLMM of  
15 the Poisson type (GLMM-Poisson) where the number of bristles was the response variable, species was  
16 a fixed effect to test and stock a random effect. For all other analyses, we tested differences in bristle  
17 number between genotypes using GLM of the Poisson type (GLM-Poisson) where the response  
18 variable was bristle number and genotype, a categorical variable, was the fixed effect. When we  
19 noticed important differences between residual deviance and residual degrees of freedom, we also fitted  
20 a quasi-likelihood model of the type "quasi-Poisson" (GLM-Quasi-Poisson) which allows for a model  
21 of the Poisson type, but where the variance can differ from the mean and is estimated based on a  
22 dispersion parameter (see for example [44] p. 225). For each model, in order to retain the model that  
23 fitted best to the data, analysis of deviance was performed using the `anova.glm()` with "test = Chisq" for  
24 GLM-Poisson and "test = F" for GLM-Quasi-Poisson. When needed, we performed multiple  
25 comparisons using the `glht()` function and the "Holm" adjustment parameter ("multcomp" package 1.4-  
26 7 [47]) which performs multiple comparisons between fitted GLM parameters and yields adjusted p-  
27 values corrected according to the Holm-Bonferroni method [48,49] also performed an exact Poisson  
28 test (R function "poisson.test") to test sample mean to a reference value assuming a Poisson  
29 distribution. Mean and 95% confidence intervals were directly extracted from the fitted GLM and  
30 transformed using `exp(coef())` and `exp(confint.default())`.

31 For EMSA data, response curves were compared between yak probe and san probe using an  
32 ANCOVA after natural log transformation. The unlabeled san 450x responses were compared between  
33 yak probe and san probe using a one-sided Mann-Whitney U-test.  
34

### 35 Abd-B homeodomain (Abd-B-HD) purification and EMSA

36 The Abd-B-HD-pGEX-4T-1 plasmid (kindly provided by Sangyun Jeong) was transformed into BL21  
37 (DE3) chemically competent cells. Protein expression was induced by 0.1 mM IPTG (isopropyl-β-D-  
38 thiogalactopyranoside, Sigma Aldrich). Recombinant protein was purified from 500 ml of bacterial  
39 culture as described in Frangioni [50] except that proteins were eluted into 50 mM Tris-HCl, pH 8.0,  
40 500 mM NaCl, 10mM reduced glutation (Sigma-Aldrich, G-4251) and 5% glycerol. Concentrations  
41 and purity of the protein were determined by SDS-PAGE and Qubit 2.0 Fluorometer (Life  
42 Technologies). Protein aliquots of 20 μl were snap-frozen in liquid nitrogen and stored at -80 °C.

43 The HPLC-purified biotinylated and non-labelled oligonucleotides (Sigma-Aldrich) were used in  
44 PCR to obtain 54 bp probes *yak* and *san* (*san=yakT1775G*) from *18C05yak-pBPSUw* and  
45 *18C05yakT1775G-pBPSUw* plasmid templates. Oligonucleotides are listed in Table S7. PCR products  
46 were column-purified.

47 We then used electrophoretic mobility shift assay (EMSA) to test whether the purified Abd-B  
48 homeodomain (ABD-B-HD) can bind directly to a 54-bp fragment of *18C05* with the T1775G site at  
49 position 13 containing either T (*yak* probe) or G (*san* probe). In each binding reaction, 20 fmol of

1 probes were mixed with the purified ABD-B HD ranging from 0-1.25  $\mu\text{g}$  (0  $\mu\text{g}$ , 0.75  $\mu\text{g}$ , 1  $\mu\text{g}$  and 1.25  
2  $\mu\text{g}$ ) in binding buffer containing 10mM TRIS pH 7.5, 50 mM KCl, 0.5 mM DTT, 6.25 mM  $\text{MgCl}_2$ , 0.05  
3 mM EDTA, 50 ng/ $\mu\text{l}$  Salmon Sperm DNA (Sigma Aldrich) and 9.00% Ficoll 400 (Sigma Aldrich). The  
4 competition assay was performed by adding 9 pmol of unlabeled probes (450-fold excess) to the  
5 binding reaction. The reaction mixtures were incubated at 22 °C for 30 min and run on a non-  
6 denaturing 6% polyacrylamide gel in 0.5X TBE (Eurofins).

7 Labeling reactions were carried out with LightShift™ Chemiluminiscent EMSA Kit  
8 (ThermoFisher Scientific) according to the provider instructions with the following modifications: after  
9 electrophoresis, gels were blotted overnight in 20X SSC using the TurboBlotter Kit (GE Healthcare  
10 Life Sciences) and cross-linking of the probe to the membrane UV-light was performed at 254 nm and  
11 120 mJ/cm<sup>2</sup> (UV stratalinker® 2400, STRATAGENE). Chemiluminescence stained membranes were  
12 exposed to a CDD camera (FUJIFILM, LAS-4000) for 50x 10 sec exposition time increments. The last  
13 images were used for quantification and were never saturated according to LAS 4000 software.  
14 To quantify the binding affinity of Abd-B-HD to the probes, the fractional occupancy (ratio of bound/  
15 (free+bound) probe) was calculated for three replicate experiments (Fig. S12. E) using the intensity  
16 values of the bands measured in Image [35]. The mean fractional occupancy was significantly lower  
17 with *D. santomea* probes than with *D. yakuba* probes (ANCOVA, F(1,15)=10.58, p = 0.005). We found  
18 that ABD-B-HD binds both *D. yakuba* and *D. santomea* DNA (Fig. S12. B-C). ABD-B-HD binding to  
19 the *D. yakuba* probe always resulted in a stronger shift than to the *D. santomea* probe. Furthermore, the  
20 *D. santomea* cold probe did not compete as efficiently as the *D. yakuba* cold probe to prevent  
21 formation of the *D. yakuba* DNA-ABD-B-HD complex (U-test, p=0.05).  
22

### 23 Abd-B RNAi and clonal analysis

24 To test whether *Abd-B* is required for hypandrial bristle development, we reduced *Abd-B* expression  
25 using either genetic mutations or RNAi. Two *UAS.Abd-B-RNAi* lines (#51167 and #26746) were  
26 crossed with 3 different *GAL4* lines, *GMR18C05-GAL4*, *NP5130-GAL4* and *NP6333-GAL4*. Crosses  
27 were kept at 29 °C and the hypandrium phenotype was examined in 10-50 F1 males (Table S13). Using  
28 the genitalia *GAL4* drivers *esg-GAL4<sup>NP5130</sup>* [51] and *NP6333* [52] to express *Abd-B.RNAi<sup>51167</sup>*, we  
29 obtained 20 males out of 100 with developed hypandrium, among which two aberrant hypandrial  
30 bristle phenotypes were found, either bristle size reduction or bristle loss (Fig. S11. A-F, n=9/11 for  
31 *NP5130*, n=8/9 for *NP6333*, Table S13). Smaller bristles might arise from a delay in *sc* expression  
32 during development [53]. Since *Abd-B* null mutations are lethal [54], we produced mitotic mutant  
33 clones for two null mutations, *Abd-B<sup>M1</sup>* [54] and *Abd-B<sup>D18</sup>* [55]. *Abd-B* mutant mitotic recombinant  
34 clones were induced by the FLP/FRT system [56] using *Abd-B<sup>M1</sup>* and *Abd-B<sup>D18</sup>* null mutations. To  
35 induce clones, ten *yw hsflp122; FRT82B hs-CD2 y<sup>+</sup> M(3) w<sup>123</sup>/TM2* virgin females were crossed to ten  
36 *y; FRT82B Abd-B<sup>M1</sup> red[1] e[11] ro[1] ca[1]/TM6B* or *y; FRT82B Abd-B<sup>D18</sup>/TM3* males (stocks were  
37 kindly provided by Ernesto Sánchez-Herrero). Crosses were flipped every 24 hours and F1 progeny  
38 were heat-shocked at 38 °C for 1 hour at different stages of larval development: 24-48, 48-72, 72-98  
39 and 96-120 hours after egg laying [57]. From both crosses, a total of 82 F1 males (Table S13) with the  
40 genotype of *yw hsflp122; FRT82B hs-CD2 y<sup>+</sup> M(3) w<sup>123</sup>/FRT82B Abd-B<sup>M1</sup> red[1] e[11] ro[1] ca[1]* and  
41 *yw hsflp122; FRT82B hs-CD2 y<sup>+</sup> M(3) w<sup>123</sup>/FRT82B Abd-B<sup>D18</sup>* were examined. Hypandria were  
42 mounted and bristle clones were screened as described above. Most of the resulting males showed  
43 extreme transformation of the genitalia (Fig. S11. G-H, O-P) but 12 males out of 82 had analyzable  
44 hypandrium (twelve males for *Abd-B<sup>M1</sup>* and two males for *Abd-B<sup>D18</sup>*). Among them, 6 males were  
45 devoid of one or both hypandrial bristles (Table S13, Fig. S11. I-N). When hypandrial bristles were  
46 present, most of them were heterozygous for the *Abd-B* mutation according to the visible markers  
47 associated with somatic recombination. Together, our results suggest that *Abd-B* is required for  
48 hypandrial bristle development.  
49

## 1 Immunostaining

2 For leg disc stainings the larvae were fed on freshly prepared Formula 4-24<sup>®</sup> Instant Drosophila  
3 Medium, Blue (Carolina) and staged by the presence of blue staining in their gut [58]. Larvae were  
4 chosen with the most clear gut, indicating a developmental stage of 1-6 hours before pupa formation  
5 [59]. Head parts of the larvae were cut and fixed in 4% PFA in PBS pH 7.4 for 20 minutes at room  
6 temperature. For pupal leg preparations the anterior part of the pupae were cut and fixed in 4% PFA in  
7 PBS pH 7.4 for 50 minutes at room temperature. Following fixation, samples were washed three times  
8 for 5 minutes in PBS containing 0.1% Tween20 and then permeabilized in TNT buffer (TRIS-NaCl  
9 buffer containing 0.5% Triton X-100) for 10 minutes. Samples were washed in 5% BSA in TNT for up  
10 to 5 hours at room temperature and then incubated with rabbit anti-GFP primary antibodies  
11 (Thermofisher #A6455) diluted in 1:1000 in TNT overnight at 4 °C and rinsed in TNT three times for  
12 10 minutes at room temperature. Then, samples were washed in 5% BSA in TNT for up to 5 hours at  
13 room temperature and incubated with donkey Anti-Rabbit Dylight<sup>®</sup> 488 (Thermofisher) secondary  
14 antibodies diluted 1:200 in TNT overnight at 4 °C. After washing the preparations in TNT for 5 minutes  
15 DNA was stained in 1µg/µl DAPI solution (Sigma-Aldrich) for 30 minutes at room temperature. The  
16 preparations were finally washed in TNT three times for 5 minutes and the imaginal discs and pupal  
17 legs were dissected in PBS and mounted in Vectashield<sup>®</sup> H-1000. Images were acquired using Spinning  
18 Disc CSU-W1. Number of GFP-positive cells were counted in the z-stack using Image J [35] in a blind  
19 fashion regarding the genotypes using randomized file names.

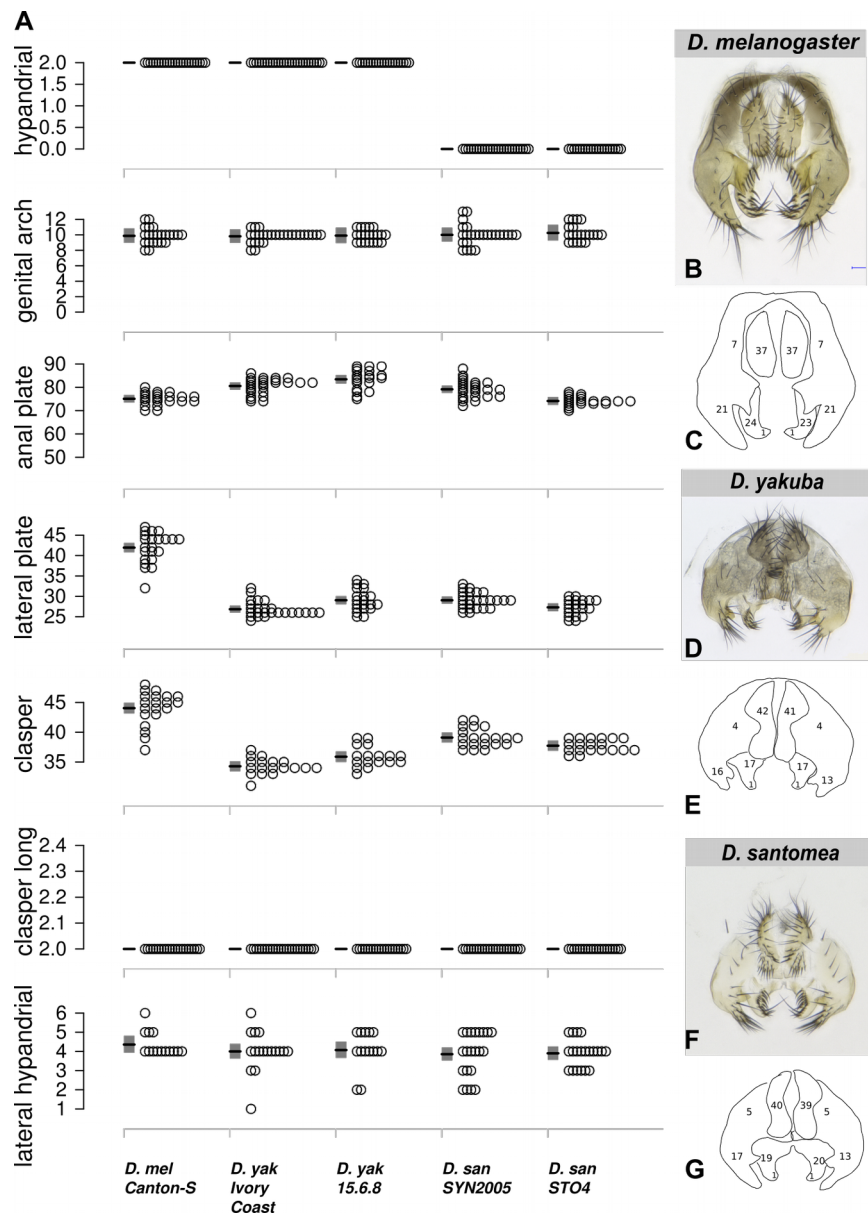

**Fig. S1. Genital bristle number in *D. yakuba* and *D. santomea*.**

(A) The bristle number of various bristle types is indicated for several strains of *D. melanogaster*, *D. yakuba* and *D. santomea*. Each grey dot represents one individual raised at 25°C. Mean (black line) and 95% confidence interval (grey rectangle) from a fitted GLM Quasi-Poisson model are shown. *D. yakuba* (yak) has fewer clasper bristles than *D. santomea* (san) (mean\_yak = 35, mean\_san = 38, GLMM-Poisson, Chisq(1) = 5.01, p = 0.025) and more anal plate bristles than *D. santomea* (mean\_yak = 82, mean\_san = 77, GLMM-Poisson, Chisq(1) = 3.87 p = 0.049). Dissected external genitalia from *D. melanogaster* Canton-S (B), *D. yakuba* Ivory Coast (D) and *D. santomea* SYN2005 (F) and their schematic representations (C,E,G) indicating the number of bristles in each genitalia part.

2  
3  
4  
5  
6  
7  
8  
9  
10

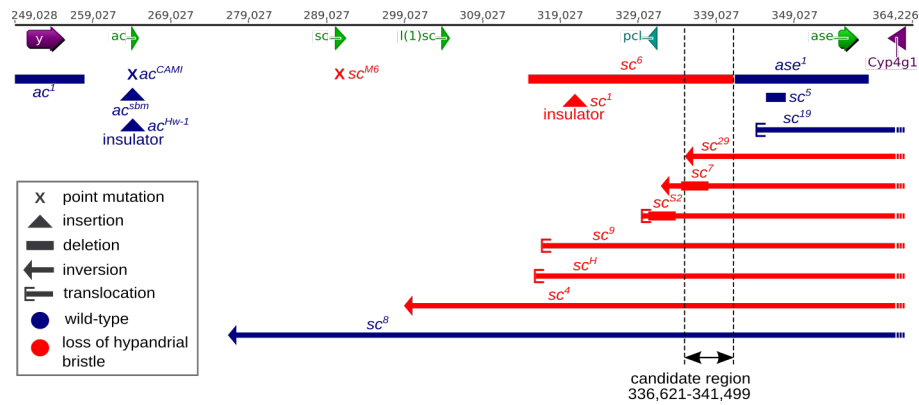

**Fig. S2. Analysis of *achaete-scute* mutants in *D. melanogaster* reveals a 5-kb candidate region driving expression in hypandrial bristles.**

Genomic organization of the *AS-C* locus in *D. melanogaster*. Arrows and arrowheads indicate the coding regions of *yellow* (*y*), *achaete* (*a*), *scute* (*sc*), *lethal of scute* (*l(1)sc*), *pepsinogen-like* (*pcl*), *asense* (*ase*) and *cytochrome P450-4g1* (*Cyp4g1*) genes, respectively. The *achaete-scute* mutants are represented in blue if they display a wild-type phenotype of 2 bristles and in red if they show a mutant phenotype with a reduced number of hypandrial bristles. Point mutations are represented as crosses, insertions as triangles, deletions as solid horizontal bars, inversions as thin horizontal bars terminated by an arrow, and translocations as thin horizontal bars terminated by a bracket. Comparison of all the tested *achaete-scute* mutants suggests that a 5-kb region (black arrows) located 45 kb away from *sc* 5' coding region drives expression in the developing hypandrial bristles.

2  
3  
4  
5  
6  
7  
8  
9  
10  
11  
12  
13

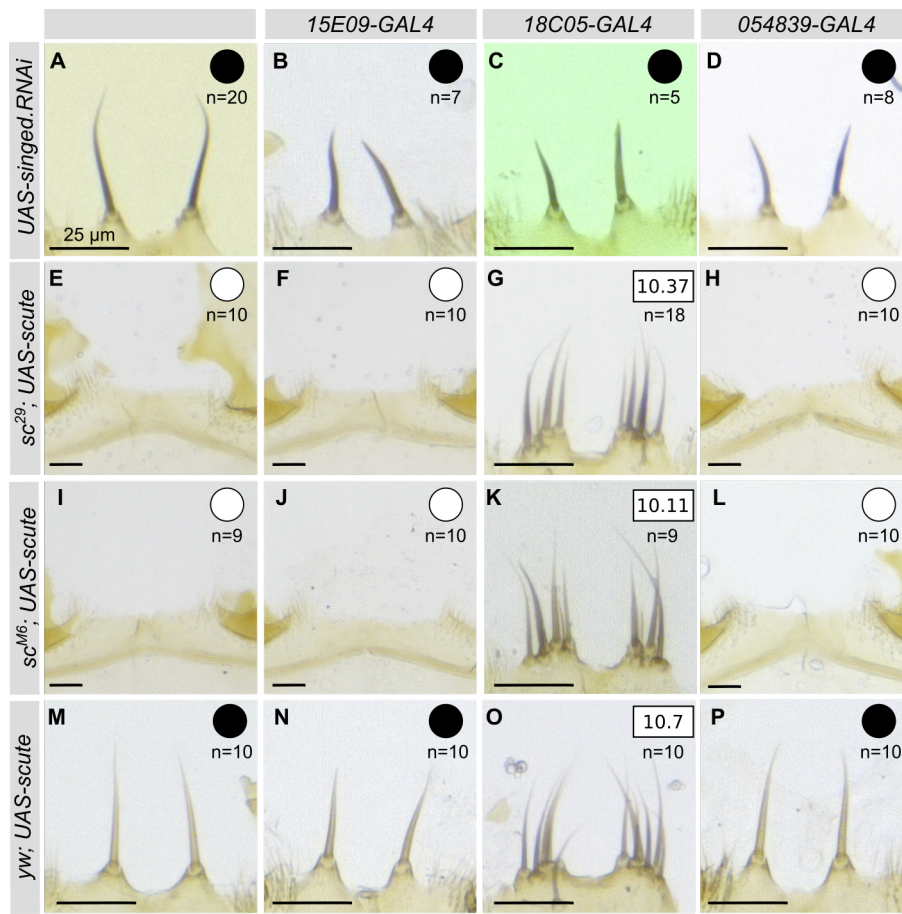

2 **Fig. S3. Three cis-regulatory elements of the *achaete-scute* complex (*AS-C*) govern expression in**  
3 **the hypandrium in *D. melanogaster*.**

4 Expression of *UAS-singed.RNAi* results in singed hypandrium bristles compared to wild-type (A) with  
5 *15E09-* (B), *18C05-* (C) and *054839-GAL4* (D). Expression of *UAS-sc* (E-P) in wild-type (M-P), *sc*<sup>29</sup>  
6 (*E-H*) or *sc*<sup>M6</sup> (*I-L*) mutant background produces extra bristles with *18C05-GAL4* (G,K,O) but not in  
7 absence of a *GAL4* reporter line (E,I,M) nor with *15E09-* (F,J,N) and *05439-GAL4* (H,L,P). White and  
8 black circles indicate zero or two hypandrial bristles, respectively. Average bristle numbers are shown  
9 in squares (G,K,O). n: number of scored individuals. (A-P) Scale bars indicate 25 μm.  
10  
11

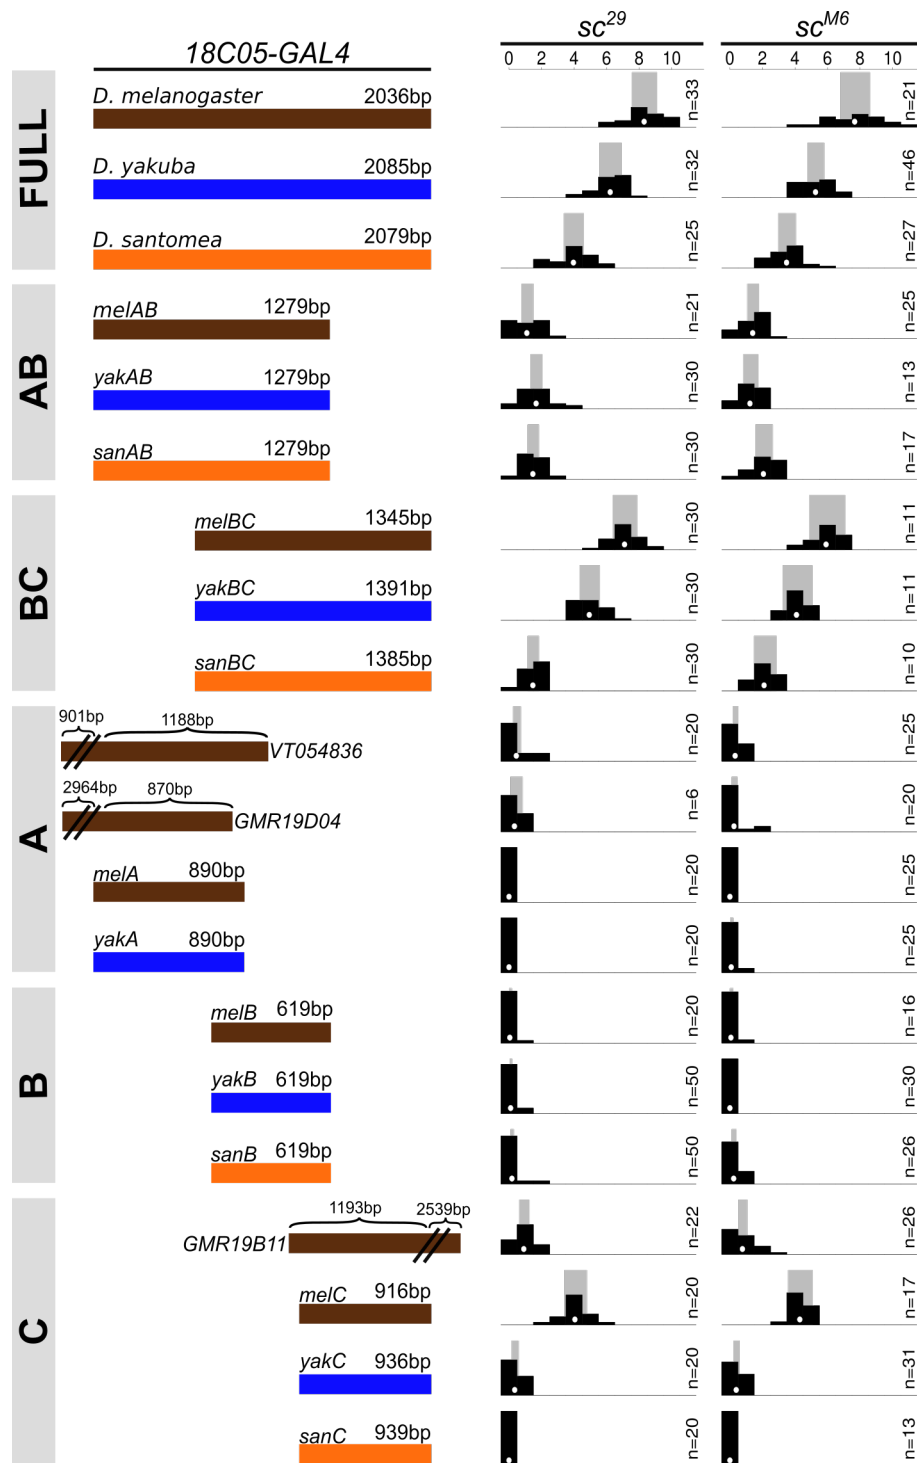

2 **Fig. S4. Full-length *18C05* is required for complete expression in the hypandrial bristles.**  
 3 Rescue of the hypandrial bristle loss of *sc<sup>29</sup>* (left column) and *sc<sup>M6</sup>* (right column) *D. melanogaster*  
 4 mutants by expression of *GAL4* with *UAS-sc* driven by various genomic regions from *D. melanogaster*  
 5 (brown), *D. yakuba* (blue) and *D. santomea* (orange). Distribution of hypandrial bristle number (black  
 6 histogram), together with mean (white dot) and 95% confidence interval (grey rectangle) from a fitted  
 7 GLM Quasi-Poisson model are shown for each genotype. n: number of scored individuals. For all three  
 8 species we found that smaller segments induced significantly fewer bristles than the corresponding full



1 region (GLM-Quasi-Poisson,  $F(19, 509) = 161.7$ , all  $p < 0.02$  for  $sc^{29}$ ;  $F(19, 415) = 125.9$ ,  $p < 0.03$  for  
2  $sc^{M6}$ ). Furthermore, the ~1400 bp 3' region (region BC) from *D. santomea* rescues fewer bristles than  
3 the corresponding region from *D. melanogaster* and *D. yakuba*. Moreover, the ~900 bp 3' region  
4 (region C) from the three species show striking differences: the region from *D. melanogaster* rescues  
5 about 4 bristles on average, the region from *D. yakuba* rescues about 0.4 bristles on average, and the  
6 region from *D. santomea* rescued no bristles. Addition of DNA 5' of the *18C05* region increases  
7 hypandrial bristle numbers (*VT054836* different from 0 (*melA*), Exact-Poisson,  $p < 10^{-16}$ ), whereas  
8 addition of DNA 3' of *18C05* reduces the number of bristles (*GM19B11* vs. *melC*; GLM-Quasi-  
9 Poisson,  $F(19, 509) = 161.7$ ,  $p < 10^{-16}$  for  $sc^{29}$ ;  $F(19, 415) = 125.9$ ,  $p < 10^{-16}$  for  $sc^{M6}$ ).  
10

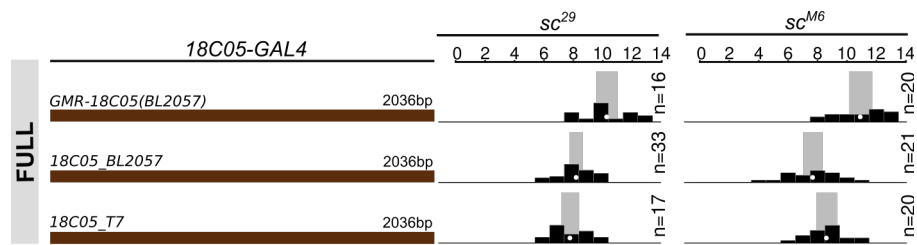

2 **Fig. S5. Comparison of *18C05 melanogaster-GAL4* constructs.**

3 Three different *D. melanogaster 18C05* sequences were tested with *UAS-sc* in the hypandrium in *sc*<sup>29</sup>  
4 (*sc*<sup>29</sup>) (first column) and *sc*<sup>M6</sup> (second column). Distribution of bristle number (black histogram), together  
5 with mean (white dot) and 95% confidence interval (grey rectangle) from a fitted GLM Quasi-Poisson  
6 model are shown. Hypandrial bristle number, for *GMR-18C05 (BL2057)* is significantly higher than  
7 *18C05\_BL2057* and *18C05\_T7* in both backgrounds (GLM-Quasi-Poisson,  $F(2, 63) = 16.88$ , both  $p <$   
8  $10^{-6}$  for *sc*<sup>29</sup>;  $F(2, 58) = 20.9$ ,  $p < 10^{-10}$  and  $p < 10^{-5}$  for *sc*<sup>M6</sup>). *GMR-18C05 (BL2057)* comes from  
9 the Janelia Farm collection (35). *18C05\_BL2057* and *18C05\_T7* were cloned in this study. *GMR-*  
10 *18C05* and *18C05\_BL2057* are the same sequence (from *D. melanogaster* Bloomington Stock Center  
11 Strain #2057), cloned in opposite direction. *18C05\_T7* contains the *18C05* sequence of *D.*  
12 *melanogaster T.7* strain. The *GMR-18C05* fragment is inserted in the expression vector 3'-5' compared  
13 to the *D. melanogaster* genome sequence. In contrast, the *18C05\_BL2057* and *18C05\_T7* are cloned 5'-  
14 3'. Comparing bristle number between *GMR-18C05* and *18C05\_BL2057* shows that the orientation of  
15 the cis-regulatory region has an effect on bristle number. All our *18C05* constructs were inserted in the  
16 same orientation, 5'-3'.  
17  
18

```
1          10         20         30         40         50         60         70         80         90         100        110
san  GAGTGAGTGGACCGCTATTTGTACACGGAAAAATACATGTCATATAACCACTTAACCCCTTTTCATTATAACGCTCTTAATTCAAATCGTTAAAGTCTATGTATACGCCATT
yak  GAGTGAGTGGACCGCTATTTGTACACGGAAAAATACATGTCATATAACCACTTAACCCCTTTTCATTATAACGCTCTTAATTCAAATCGTTAAAGTCTATGTATACGCCATT
120        130        140        150        160        170        180        190        200        210        220
san  TAAACCGTTGATGAAATGCAACTTGAATAATGAGAACAATTTAAATGCTCTGCTTTTAAATAGATATATGCGAGAGTTTATCTGTGCTATTAAGGCAATATATATCT
yak  TAAACCGTTGATGAAATGCAACTTGAATAATGAGAACAATTTAAATGCTCTGCTTTTAAATAGATATATGCGAGAGTTTATCTGTGCTATTAAGGCAATATATATCT
230        240        250        260        270        280        290        300        310        320        330
san  CTGATGAGCGAGCGAACACATCAGGGAAGATTGAGGATGGCGCAATATGAAGCCATCTCCCTCCGCAACGTCGATCGCCGCAAACTCGCTCAAATCAAAACACATCCTCG
yak  CTGATGAGCGAGCGAACACATCAGGGAAGATTGAGGATGGCGCAATATGAAGCCATCTCCCTCCGCAACGTCGATCGCCGCAAACTCGCTCAAATCAAAACACATCCTCG
340        350        360        370        380        390        400        410        420        430        440
san  GCCAAAAATGTTGTTAAATGAGTGACTTTGAAGGGGAAGATGGGAAGATCGGAAGATCCCAATCCCAAAATGAGAGATCCCAAGGAAAGGAGGAGGATGAGTTGATGCTGCTG
yak  GCCAAAAATGTTGTTAAATGAGTGACTTTGAAGGGGAAGATGGGAAGATCGGAAGATCCCAATCCCAAAATGAGAGATCCCAAGGAAAGGAGGAGGATGAGTTGATGCTGCTG
450        460        470        480        490        500        510        520        530        540        550
san  CTGAGCTGCTGAGGTTAGCTTACGCAATTTAGCCGTTTATTTATTTGCGGACTCAGATCGCGCAGGTCACGGGGCCAAAATTAAGGATCCCGTCCGCAAGTCAAAGTGA
yak  CTGAGCTGCTGAGGTTAGCTTACGCAATTTAGCCGTTTATTTATTTGCGGACTCAGATCGCGCAGGTCACGGGGCCAAAATTAAGGATCCCGTCCGCAAGTCAAAGTGA
560        570        580        590        600        610        620        630        640        650        660
san  AATTTTTCGACGGCCTACAGACTCATATAGCGAACTCACTGCAACAGCAATGAAATATCAACAGCGTTTGAACAAGTGGATTAAGAGCGATCTGAAACGGATGAAACGGCG
yak  AATTTTTCGACGGCCTACAGACTCATATAGCGAACTCACTGCAACAGCAATGAAATATCAACAGCGTTTGAACAAGTGGATTAAGAGCGATCTGAAACGGATGAAACGGCG
670        680        690        700        710        720        730        740        750        760        770
san  AGTGCAGACACACAGACAGCTCTTCCGCTCTCGCTTCTTATAAATGAAACAGGAAATCGGGCATTCGCA-----GCCCTTCAAGCTTCAAGCGCCAAAGGGAACTCAAAT
yak  AGTGCAGACACACAGACAGCTCTTCCGCTCTCGCTTCTTATAAATGAAACAGGAAATCGGGCATTCGCAAGCCCTTCAAGCTTCAAGCGCCAAAGGGAACTCAAAT
780        790        800        810        820        830        840        850        860        870        880
san  TTTACTCTATTTACAAATCTTTTACGTAACGGCATCTAGGCTAGGCTGCTCTTTAAGTCGGCTTAACAGCTTTGACGATGGTGGACATGCTATTTTCTATTTTCAAGTGA
yak  TTTACTCTATTTACAAATCTTTTACGTAACGGCATCTAGGCTAGGCTGCTCTTTAAGTCGGCTTAACAGCTTTGACGATGGTGGACATGCTATTTTCTATTTTCAAGTGA
890        900        910        920        930        940        950        960        970        980        990
san  GCTTTCTATAAAATGAAAGTGTTCGGGGCAGCAATTTAGTTAGAGCCAGGTACCGCTTACTTTCACCAAGTTAAAGCGTTCAAGGTGTAAAGGAATGTACGCAAGCAAGAT
yak  GCTTTCTATAAAATGAAAGTGTTCGGGGCAGCAATTTAGTTAGAGCCAGGTACCGCTTACTTTCACCAAGTTAAAGCGTTCAAGGTGTAAAGGAATGTACGCAAGCAAGAT
1000       1010       1020       1030       1040       1050       1060       1070       1080       1090       1100
san  CACGTGGTGAATGGACTCTTGGACAGTTGGCAATCGGGCTCCATGCTGACGTCGATACCAAGTTTCAAGTTGGCAATCGGGTTTCGGTGGGATTCATTCATGGAGTTCCGGACC
yak  CACGTGGTGAATGGACTCTTGGACAGTTGGCAATCGGGCTCCATGCTGACGTCGATACCAAGTTTCAAGTTGGCAATCGGGTTTCGGTGGGATTCATTCATGGAGTTCCGGACC
1110       1120       1130       1140       1150       1160       1170       1180       1190       1200       1210
san  TAAAGCCGTTAAGTCTCTCTTCTTCTCTCTCTCTCTCTCTCTCTCTCTCTCTCTCTCTCTCTCTCTCTCTCTCTCTCTCTCTCTCTCTCTCTCTCTCTCTCTCTCTCTCT
yak  TAAAGCCGTTAAGTCTCTCTTCTCTCTCTCTCTCTCTCTCTCTCTCTCTCTCTCTCTCTCTCTCTCTCTCTCTCTCTCTCTCTCTCTCTCTCTCTCTCTCTCTCTCTCTCT
1220       1230       1240       1250       1260       1270       1280       1290       1300       1310       1320
san  CTAATGTCGAACCTTACCTTGCATTCAGCTGGCGCAACAACACCACTCAACGGGAGCAGCAGATTCGCGGGTTGCTGCTGTTTTAGGGTTCTTGGCTCTCATGGATCCCTATG
yak  CTAATGTCGAACCTTACCTTGCATTCAGCTGGCGCAACAACACCACTCAACGGGAGCAGCAGATTCGCGGGTTGCTGCTGTTTTAGGGTTCTTGGCTCTCATGGATCCCTATG
1330       1340       1350       1360       1370       1380       1390       1400       1410       1420       1430
san  GGCTCAGCAGCTGAGTGTATACCGGAAATAAATGCTGCTTCTTGGAAATAGTAGTGAAGCATCTATATATATTTGTTTTGGGAAACAACATGCAATGATGATGCTG
yak  GGCTCAGCAGCTGAGTGTATACCGGAAATAAATGCTGCTTCTTGGAAATAGTAGTGAAGCATCTATATATATTTGTTTTGGGAAACAACATGCAATGATGATGCTG
1440       1450       1460       1470       1480       1490       1500       1510       1520       1530       1540
san  CTCAATTAATGAAATGTTAACTCATCATCGAGCACCATAATGCTGTGAGAAAATACCTAGTTGGGATTTGTTCTCTGTCGGCGCTCACTAAATTTTGGCCGAAAGGAGG
yak  CTCAATTAATGAAATGTTAACTCATCATCGAGCACCATAATGCTGTGAGAAAATACCTAGTTGGGATTTGTTCTCTGTCGGCGCTCACTAAATTTTGGCCGAAAGGAGG
1550       1560       1570       1580       1590       1600       1610       1620       1630       1640       1650
san  GATTTGAATCCGATGCTCAATATAAAGCCCAACGCTGCTGCCAAGCTACGAAATCCCGCTGTTGATAGCTCATCTTGAATGCTGCTTACTTACGCAAGAAAGGAGGCTTCTC
yak  GATTTGAATCCGATGCTCAATATAAAGCCCAACGCTGCTGCCAAGCTACGAAATCCCGCTGTTGATAGCTCATCTTGAATGCTGCTTACTTACGCAAGAAAGGAGGCTTCTC
1660       1670       1680       1690       1700       1710       1720       1730       1740       1750       1760
san  CTGAAGCTCCCTGGCCACCAATGACCGTTCTTCTGATTTGACTTTGGTTACGCCACCTCGGAATAAATCAACAGATACCAATAACACGACGCGAGGAGGCAAGAAAGGGTG
yak  CTGAAGCTCCCTGGCCACCAATGACCGTTCTTCTGATTTGACTTTGGTTACGCCACCTCGGAATAAATCAACAGATACCAATAACACGACGCGAGGAGGCAAGAAAGGGTG
1770       1780       1790       1800       1810       1820       1830       1840       1850       1860       1870
san  CCGGCTCCGGTCACTCAAGTTTTCGGATTGCTTACGGCGCTTCAGATAGCACTGCTGCTACATCTCTTATTTTTTTTTTATTTTTCTGAAAAGCCCTGGTTACTCATTAAC
yak  CCGGCTCCGGTCACTCAAGTTTTCGGATTGCTTACGGCGCTTCAGATAGCACTGCTGCTACATCTCTTATTTTTTTTTTATTTTTCTGAAAAGCCCTGGTTACTCATTAAC
1880       1890       1900       1910       1920       1930       1940       1950       1960       1970       1980
san  CCGGCTCCGGTCACTCAAGTTTTCGGATTGCTTACGGCGCTTCAGATAGCACTGCTGCTACATCTCTTATTTTTTTTTTATTTTTCTGAAAAGCCCTGGTTACTCATTAAC
yak  CCGGCTCCGGTCACTCAAGTTTTCGGATTGCTTACGGCGCTTCAGATAGCACTGCTGCTACATCTCTTATTTTTTTTTTATTTTTCTGAAAAGCCCTGGTTACTCATTAAC
1990       2000       2010       2020       2030       2040       2050       2060       2070       2080       2090
san  CAACAGAAAGTCAAAATGAAACGGTAGCTTCAATTTGAGCGCATCTGATGAAAGGTTGATGAAAGGAGCCCTTTGACAGAGACATCATCGCCACCCGATAGCAAAACGCTC
yak  CAACAGAAAGTCAAAATGAAACGGTAGCTTCAATTTGAGCGCATCTGATGAAAGGTTGATGAAAGGAGCCCTTTGACAGAGACATCATCGCCACCCGATAGCAAAACGCTC
```

2 Fig. S6. Alignment of *18C05* sequence from *D. santomea* SYN2005 (san) and *D. yakuba* Ivory  
3 Coast (yak).  
4  
5



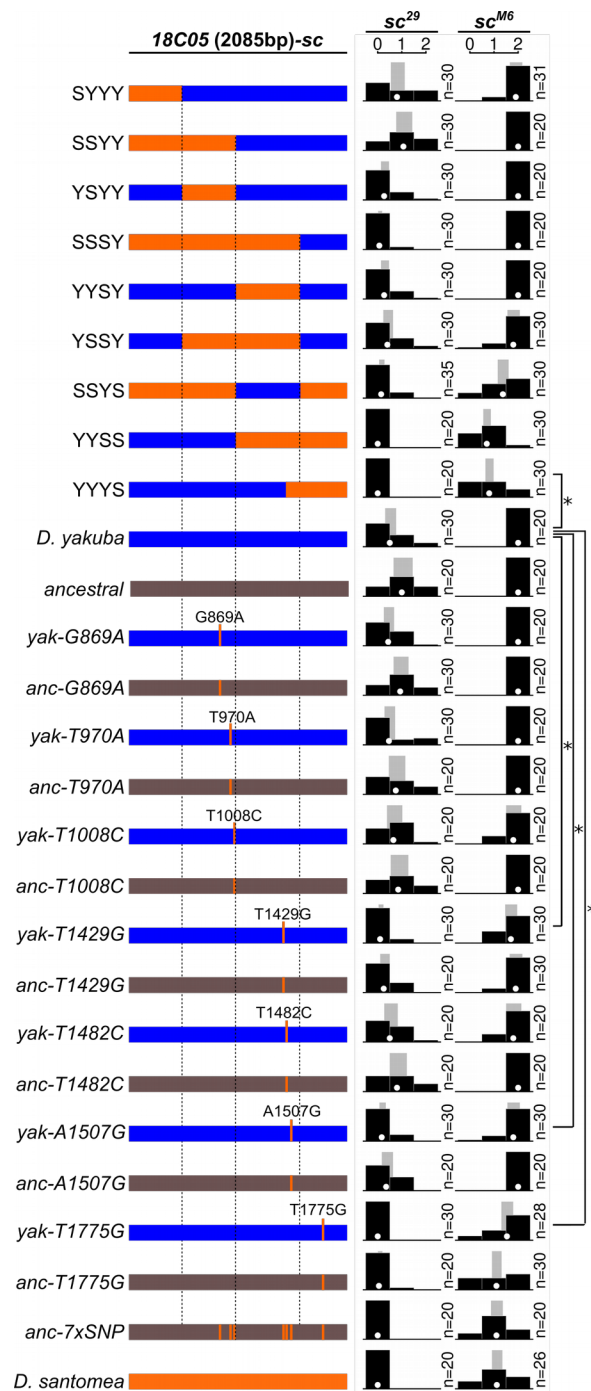

**Fig. S8. Three *D. santomea*-specific substitutions in *18C05* cause the loss of hypandrial bristles**

Various full-length *18C05* regions were cloned in front of the *D. melanogaster sc* coding region and tested for their ability to rescue hypandrial bristles in *sc*<sup>29</sup> (left column) and *sc*<sup>M6</sup> (right column) mutant backgrounds. The *18C05* sequence from *D. yakuba* (blue, labeled with Y) and from *D. santomea* (orange, labeled with S) were divided into four subregions which were then fused together in different chimeric combinations. *D. santomea*-specific substitutions are represented as dark orange bars. Seven *D. santomea*-specific substitutions were introduced into either the *D. yakuba* region (blue) or the ancestrally reconstructed *18C05* region (dark grey). n: number of scored individuals. \*: p < 0.05. Replacing the 5' half (1-1020 bp) of *D. yakuba 18C05* by *D. santomea* corresponding region has little

2  
3  
4  
5  
6  
7  
8  
9  
10

1 or no effect (GLM-Quasi-Poisson,  $F(26,658) = 12.09$ , SSYY versus *D. yakuba*:  $p=0.031$  in  $sc^{29}$ , YSY Y  
2 not different from *D. yakuba*:  $p = 0.432$  in  $sc^{29}$ , SYYY not different from *D. yakuba*:  $p = 0.432$  in  $sc^{29}$ )  
3 whereas replacing the 3' end (1573-2088 bp) decreases bristle number (GLM-Quasi-Poisson,  $F(26,618)$   
4  $= 16.04$ , YYYS versus *D. yakuba*:  $p<10^{-16}$  in  $sc^{M6}$ , YYSS versus *D. yakuba*:  $p<10^{-16}$  in  $sc^{M6}$ ). The 3'  
5 middle part (1021-1572 bp) has no effect (YYSY not different from *D. yakuba*:  $p = 0.432$  in  $sc^{29}$ , YYSS  
6 versus YYYS:  $p = 0.579$  in  $sc^{M6}$ ) except in presence of the *D. santomea* 5' half (1-1020 bp), in which  
7 case it decreases bristle number (SSSY versus SSYY:  $p<10^{-4}$  in  $sc^{29}$ ). Our analysis of chimeric  
8 constructs thus indicates that at least two changes, in regions 1021-1572 and 1573-2088, contribute to  
9 the reduced ability of *D. santomea 18C05* to produce hypandrial bristles. Three substitutions  
10 significantly decreased the number of rescued bristles in the *D. yakuba* and/or the ancestral sequence  
11 (T1429G:  $p=0.021$  and  $p=0.009$  in  $sc^{29}$ , respectively; A1507G:  $p=0.066$  and  $p=0.03$  in  $sc^{29}$ ,  
12 respectively; T1775G:  $p=0.013$  and  $p=10^{-8}$  in  $sc^{M6}$ , respectively).  
13

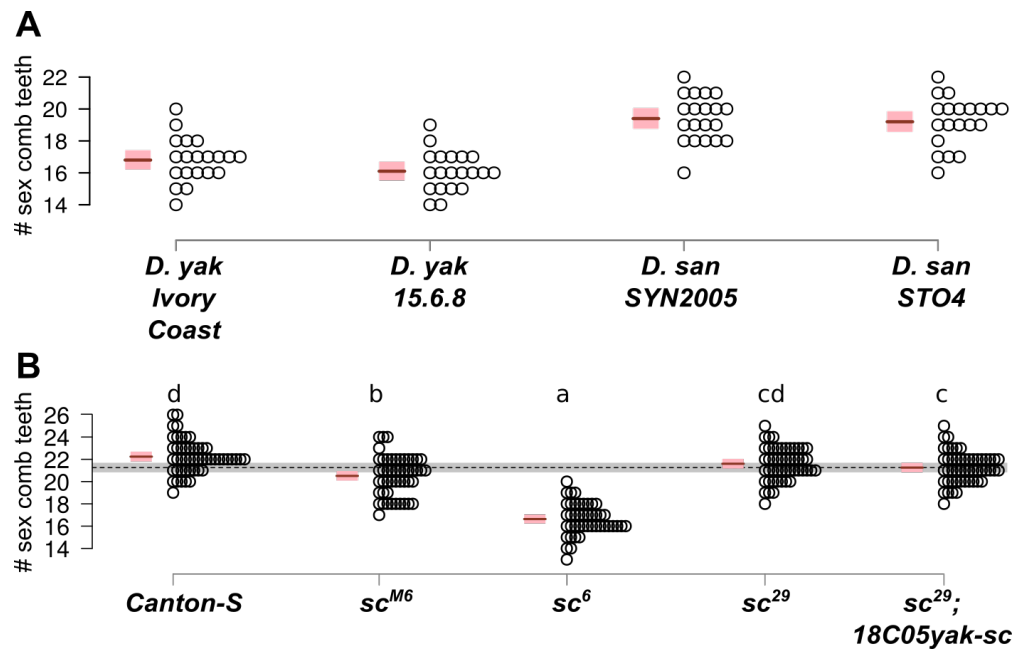

2 **Fig. S9. Sex comb tooth number in *D. yakuba* and *D. santomea* and *D. melanogaster scute***  
3 **mutants.**

4 Each circle represents one individual raised at 25° C. Mean (brown line) and 95% confidence interval  
5 (pink rectangle) from a fitted GLM Quasi-Poisson model are shown. (A) Sex comb tooth number is  
6 significantly different between *D. yakuba* and *D. santomea* (GLM-Poisson,  $\text{Chisq}(1)=2.76$ ,  $p = 0.007$ ).  
7 (B)  $sc^{M6}$  and  $sc^6$  have significantly different sex comb tooth number than Canton-S. Letters indicate the  
8 results of all-pairwise comparisons after Holm-Bonferroni correction. Two genotypes are significantly  
9 different from each other ( $p < 0.05$ ) when they do not share a letter. Sex comb tooth number of  $sc^{29}$   
10 mutant males is not significantly different from wild-type ( $F(4,239)=100.06$ ,  $p=0.09$ ) and the  
11 *18C05yak-sc* construct does not significantly increase sex comb tooth number in the  $sc^{29}$  background  
12 ( $sc^{29}$  versus  $sc^{29};18C05yak-sc$ ,  $F(4,239)=100.06$ ,  $p=0.27$ ), so we did not examine the effects of *D.*  
13 *santomea* substitutions in the  $sc^{29}$  background.  
14  
15

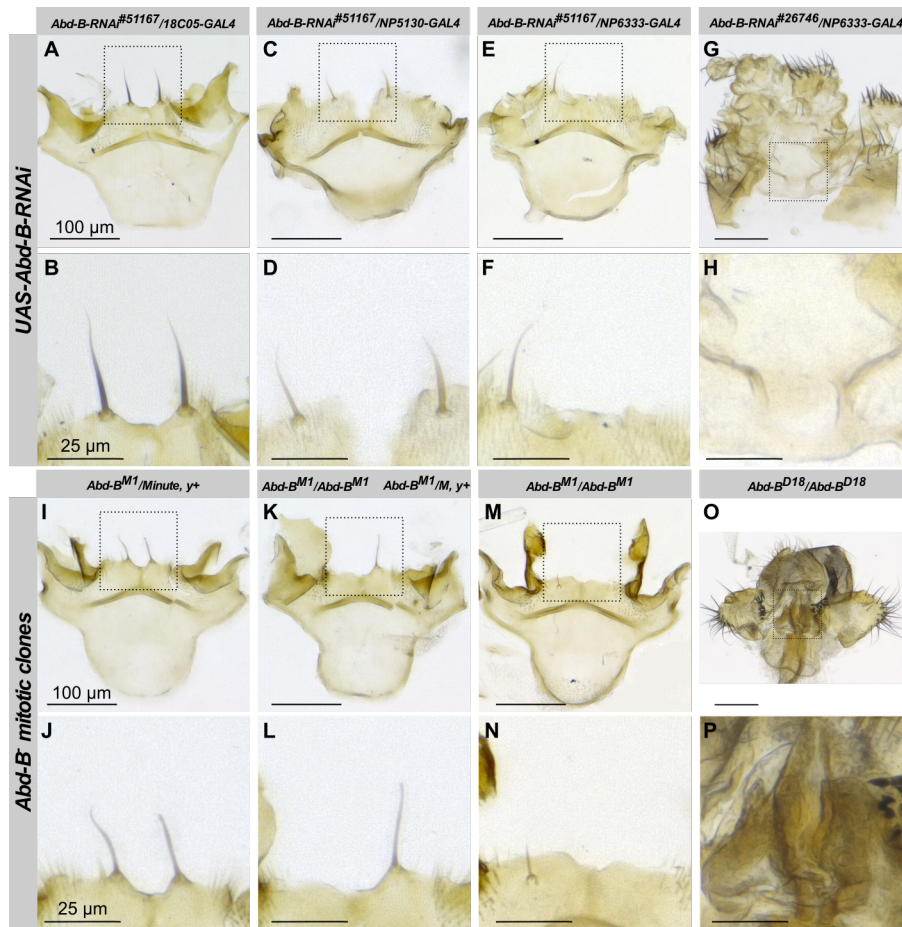

**Fig. S10. Hyandrial bristle development affected in *Abd-B-RNAi* and *Abd-B* clones.**

Wild-type hyandrial bristles. (B) In *Abd-B-RNAi*<sup>#51167</sup>/*GMR18C05-GAL4* males the hyandrial bristles are thinner. (C) In *Abd-B-RNAi*<sup>#51167</sup>/*NP5130-GAL4* hyandrial bristles are thinner and shorter. (D) In *Abd-B-RNAi*<sup>#51167</sup>/*NP6333-GAL4* hyandrial bristles are thinner or lost. (I-N) In *Abd-B* clones hyandrial bristles are lost. Clones were selected in *Minute, y*<sup>+</sup> background. One hyandrium with two *Minute, y*<sup>+</sup> bristles (I-J), one hyandrium with only *Minute, y*<sup>+</sup> bristle (K-L) and one hyandrium with no hyandrial bristle (M-N) are shown. Extreme transformations of genitalia with abnormal hyandrium are shown in *Abd-B-RNAi*<sup>#26746</sup>/*NP6333-GAL4* (G-H).

2  
3  
4  
5  
6  
7  
8  
9  
10  
11



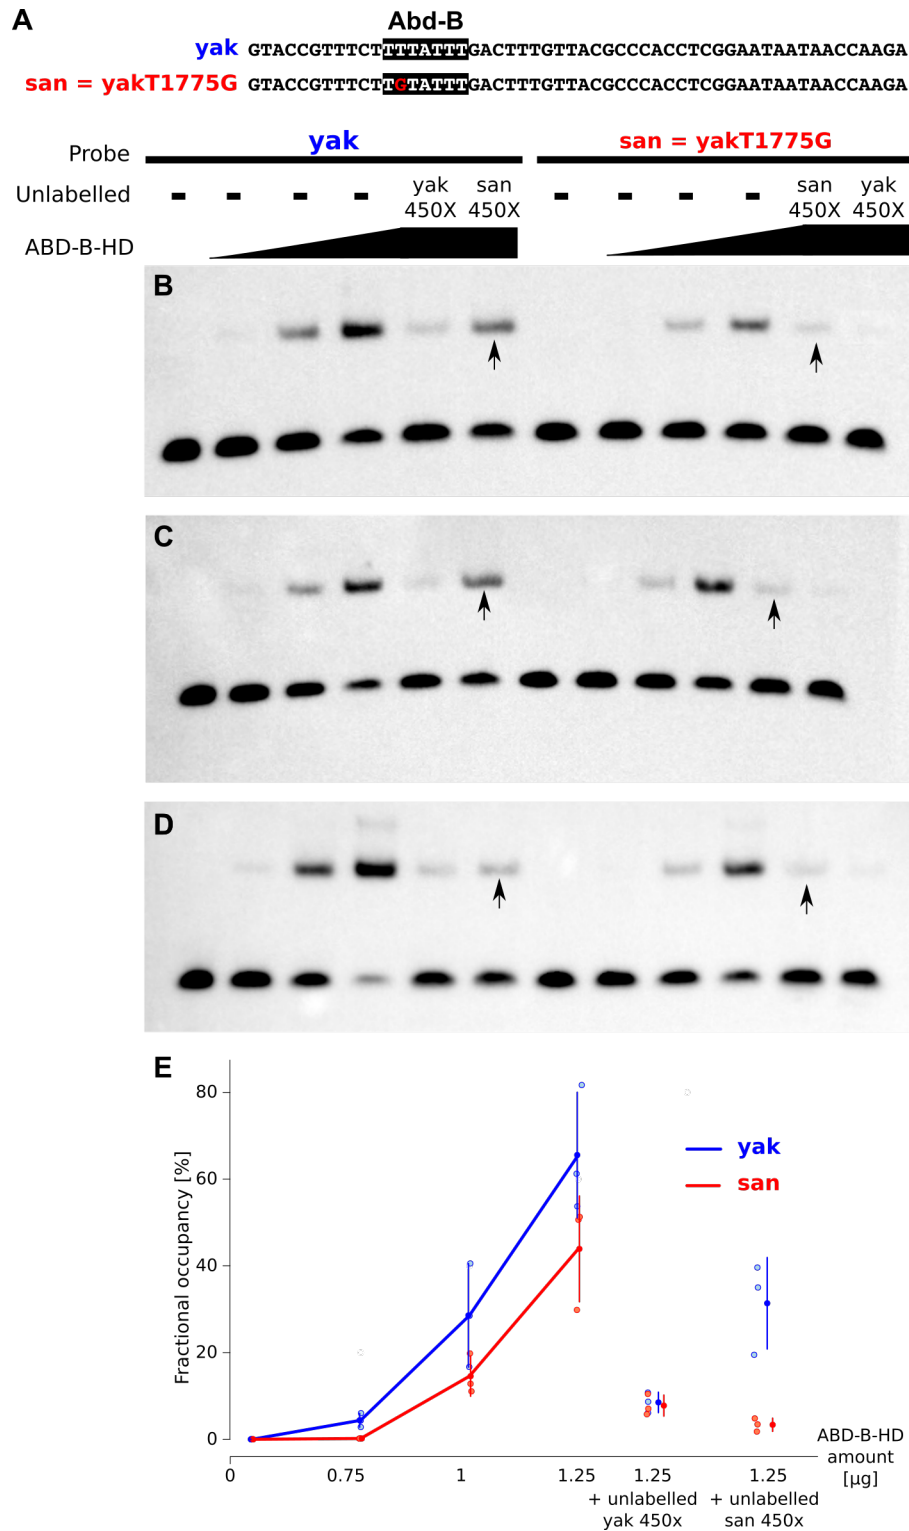

2  
3  
4  
5  
6

**Fig. S11. *D. santomea*-specific substitution T1775G affects Abd-B binding.**

(A) Two double-stranded oligonucleotides were used in EMSA, one with *D. yakuba* sequence (yak, blue) and one with *D. santomea* sequence (san=yakT1775G, red). The putative Abd-B binding site is shown in black. (B-D) Three parallel EMSA were performed with increasing amount of Abd-B-HD (0.75 μg, 1.0 μg and 1.25 μg) and yak probe or san probe. In competitor lanes 450x excess of

1 unlabelled *yak* probe or *san* probe were added to the binding reaction. In all experiments *san* probe  
2 binds less than *yak* probe to Abd-B-HD, and unlabelled *san* probe competes less the band shift of the  
3 labelled probe compared to the *yak* probe (indicated with arrows). (E) Quantification of EMSA shifts.  
4 Fractional occupancy (ratio of bound/(free+bound) probe) is shown for three parallel experiments.  
5 Mean (dot) and standard deviation (bar) are shown for *yak* and *san* probes, in blue and red,  
6 respectively.

1  
2  
3  
4

**Table S1. Fly lines used.**

See Table S4 for *GAL4* lines others than *DC-GAL4* and Table S5 for *achaete-scute* mutant lines.

| Species Name           | Strain Name                               | Origin                                                                                                                                                                  |
|------------------------|-------------------------------------------|-------------------------------------------------------------------------------------------------------------------------------------------------------------------------|
| <i>D. melanogaster</i> | 3870                                      | Given by T. Long.<br>RVC 3. Collected from Riverside, California, USA in 1963                                                                                           |
| <i>D. melanogaster</i> | 3844                                      | Given by T. Long. San Diego Stock Center #14021-0231.60<br>BS1. Collected from Barcelona, Spain in 1954                                                                 |
| <i>D. melanogaster</i> | 3841                                      | Given by T. Long. San Diego Stock Center #14021-0231.59<br>BOG1. Collected from Bogota, Colombia in 1962                                                                |
| <i>D. melanogaster</i> | 3852                                      | Given by T. Long. San Diego Stock Center #14021-0231.64<br>KSA2. Collected in 1963                                                                                      |
| <i>D. melanogaster</i> | 3864                                      | Given by T. Long. San Diego Stock Center # 14021-0231.68<br>KI2. Collected from Israel in 1954                                                                          |
| <i>D. melanogaster</i> | T.7                                       | Given by T. Long. San Diego Stock Center #14021-0231.07<br>Collected from Taiwan in 1968                                                                                |
| <i>D. melanogaster</i> | T.4                                       | Given by T. Long. San Diego Stock Center #14021-0231.04<br>Collected from Kuala Lumpur, Malaysia in 1962                                                                |
| <i>D. melanogaster</i> | 3875                                      | Given by T. Long. San Diego Stock Center #14021-0231.69<br>VAG1. Collected from Athens, Greece in 1965                                                                  |
| <i>D. melanogaster</i> | 3886                                      | Given by T. Long. Wild 5B. Collected from Red Top<br>Mountain, Georgia in 1966                                                                                          |
| <i>D. melanogaster</i> | T.1                                       | Given by T. Long. San Diego Stock Center #14021-0231.04<br>Collected from Ica, Peru in 1956                                                                             |
| <i>D. melanogaster</i> | 3839                                      | Given by T. Long. San Diego Stock Center # 14021-0231.58<br>BER1. Collected from Bermudas in 1954.                                                                      |
| <i>D. melanogaster</i> | 3846                                      | Given by T. Long. San Diego Stock Center #14021-0231.62<br>CA1. Collected from Cape Town, South Africa.                                                                 |
| <i>D. melanogaster</i> | Sam                                       | Given by T. Long. DSPR line. originally from TFC Mackay<br>Sam; <i>ry506</i>                                                                                            |
| <i>D. melanogaster</i> | iso-1                                     | Bloomington Stock Center #2057 (ordered)<br><i>y[1]; Gr22b[iso-1] Gr22d[iso-1] cn[1] CG33964[iso-1] bw[1]<br/>sp[1]; LysC[iso-1] MstProx[iso-1] GstD5[iso-1] Rh6[1]</i> |
| <i>D. melanogaster</i> | Canton-S                                  | Kyoto DGGR #105666 (Given by Roger Karess)                                                                                                                              |
| <i>D. melanogaster</i> | <i>dor[4]/C(1)RM, y[1]<br/>w[1] ff[1]</i> | Bloomington Stock Center #35 (ordered)                                                                                                                                  |
| <i>D. melanogaster</i> | <i>Nup98-<br/>96[339]/TM3, Sb[1]</i>      | Bloomington Stock Center #4951 (ordered)                                                                                                                                |
| <i>D. melanogaster</i> | <i>Df(3R)D605/TM3,</i>                    | Bloomington Stock Center #823 (ordered)                                                                                                                                 |

|                        | <i>Sb[1] Ser[1]</i>                      |                                                                                                |
|------------------------|------------------------------------------|------------------------------------------------------------------------------------------------|
| <i>D. melanogaster</i> | DC002                                    | Bloomington Stock Center #30213 (ordered)<br>w1118; Dp(1;3)DC002, PBac{DC002}VK00033           |
| <i>D. melanogaster</i> | DC003                                    | Bloomington Stock Center #30214 (ordered)<br>w1118; Dp(1;3)DC003, PBac{DC003}VK00033           |
| <i>D. melanogaster</i> | DC004                                    | Bloomington Stock Center #30215 (ordered)<br>w1118; Dp(1;3)DC004, PBac{DC004}VK00033/TM6C, Sb1 |
| <i>D. melanogaster</i> | DC006                                    | Bloomington Stock Center #30217 (ordered)<br>w1118; Dp(1;3)DC006, PBac{DC006}VK00033/TM6C, Sb1 |
| <i>D. melanogaster</i> | DC097                                    | Bloomington Stock Center #31440 (ordered)<br>w1118; Dp(1;3)DC097, PBac{DC097}VK00033/TM6C, Sb1 |
| <i>D. melanogaster</i> | DC098                                    | Bloomington Stock Center #31441 (ordered)<br>w1118; Dp(1;3)DC098, PBac{DC098}VK00033           |
| <i>D. melanogaster</i> | DC007                                    | Bloomington Stock Center #30218 (ordered)<br>w1118; Dp(1;3)DC007, PBac{DC007}VK00033/TM6C, Sb1 |
| <i>D. melanogaster</i> | DC008                                    | Bloomington Stock Center #30745 (ordered)<br>w1118; Dp(1;3)DC008, PBac{DC008}VK00033           |
| <i>D. melanogaster</i> | DC009                                    | Bloomington Stock Center #30219<br>w1118; Dp(1;3)DC009, PBac{DC009}VK00033                     |
| <i>D. melanogaster</i> | DC012                                    | Bloomington Stock Center #30222 (ordered)<br>w1118; Dp(1;3)DC012, PBac{DC012}VK00033           |
| <i>D. melanogaster</i> | DC099                                    | Bloomington Stock Center #30749 (ordered)<br>w1118; Dp(1;3)DC099, PBac{DC099}VK00033           |
| <i>D. melanogaster</i> | DC013                                    | Bloomington Stock Center #30746 (ordered)<br>w1118; Dp(1;3)DC013, PBac{DC013}VK00033           |
| <i>D. melanogaster</i> | DC014                                    | Bloomington Stock Center #31434 (ordered)<br>w1118; Dp(1;3)DC014, PBac{DC014}VK00033           |
| <i>D. melanogaster</i> | DC400                                    | Bloomington Stock Center #30795 (ordered)<br>w1118; Dp(1;3)DC400, PBac{DC400}VK00033           |
| <i>D. melanogaster</i> | DC019                                    | Bloomington Stock Center #30223 (ordered)<br>w1118; Dp(1;3)DC019, PBac{DC019}VK00033           |
| <i>D. melanogaster</i> | DC436                                    | Bloomington Stock Center #33487 (ordered)<br>w1118; Dp(1;3)DC436, PBac{DC436}VK00033/TM6C, Sb1 |
| <i>D. melanogaster</i> | DC401                                    | Bloomington Stock Center #30796 (ordered)<br>w1118; Dp(1;3)DC401, PBac{DC401}VK00033           |
| <i>D. melanogaster</i> | <i>DC-GAL4</i>                           | <i>yw ; DC-GAL4 , UAS-GFP /TM6B</i><br>Given by V. Stamatakis (Pat Simpson lab).               |
| <i>D. melanogaster</i> | <i>UAS-forked.RNAi</i> <sup>33200</sup>  | VDRC #33200 (ordered)                                                                          |
| <i>D. melanogaster</i> | <i>UAS-singed.RNAi</i> <sup>105747</sup> | VDRC #105747 (ordered)                                                                         |

|                        |                                            |                                                                                                                                                                                                   |
|------------------------|--------------------------------------------|---------------------------------------------------------------------------------------------------------------------------------------------------------------------------------------------------|
| <i>D. melanogaster</i> | <i>UAS-forked.RNAi</i> <sup>24632</sup>    | VDRC #24632 (ordered)                                                                                                                                                                             |
| <i>D. melanogaster</i> | <i>UAS-ac.RNAi</i> <sup>100647</sup>       | VDRC #100647 (ordered)                                                                                                                                                                            |
| <i>D. melanogaster</i> | <i>UAS-singed.RNAi</i> <sup>32579</sup>    | VDRC #32579 (ordered)                                                                                                                                                                             |
| <i>D. melanogaster</i> | <i>UAS-forked.RNAi</i> <sup>103813</sup>   | VDRC #103813 (ordered)                                                                                                                                                                            |
| <i>D. melanogaster</i> | <i>UAS-sc.RNAi</i> <sup>105951</sup>       | VDRC #105951 (ordered)                                                                                                                                                                            |
| <i>D. melanogaster</i> | <i>yw; UAS-y</i>                           | Bloomington Stock Center #3043<br><i>y</i> [1] <i>w</i> [1118]; P{ <i>w</i> [+mC]=UAS- <i>y</i> .C}MC1                                                                                            |
| <i>D. melanogaster</i> | <i>yw; UAS-y TM3/pnr-GAL4</i>              | Given by M. Rebeiz.<br><i>y w; UAS-y TM3 Ser / pnr-GAL4</i>                                                                                                                                       |
| <i>D. melanogaster</i> | <i>UAS-mCD8-GFP</i>                        | Given by V. Brodu. <i>GFP</i> transgene on second chromosome                                                                                                                                      |
| <i>D. melanogaster</i> | <i>w; UAS-Dcr2 ; Pin/CyO</i>               | Bloomington Stock Center #24644 (ordered)                                                                                                                                                         |
| <i>D. melanogaster</i> | <i>UAS-scute</i>                           | Bloomington Stock Center #51672 (ordered)                                                                                                                                                         |
| <i>D. melanogaster</i> | <i>GFP-sc</i>                              | <i>GFP</i> inserted at the <i>scute</i> locus by CRISPR-mediated homologous recombination, which produces Scute protein with GFP sequence fused at the N terminus (Given by F. Schweisguth) [59b] |
| <i>D. melanogaster</i> | <i>yw; UAS-Abd-B.RNAi</i> <sup>51167</sup> | Bloomington Stock Center #51167 (ordered)                                                                                                                                                         |
| <i>D. melanogaster</i> | <i>yw; UAS-Abd-B.RNAi</i> <sup>26746</sup> | Bloomington Stock Center #26746 (ordered)                                                                                                                                                         |
| <i>D. melanogaster</i> | <i>yw; NP5130-GAL4</i>                     | Kyoto Drosophila Stock Center (ordered)                                                                                                                                                           |
| <i>D. melanogaster</i> | <i>yw; NP6333-GAL4</i>                     | Kyoto Drosophila Stock Center (ordered)                                                                                                                                                           |
| <i>D. simulans</i>     |                                            | Collected from Marrakech, Morocco by J. David in 2010                                                                                                                                             |
| <i>D. mauritiana</i>   |                                            | Collected from Mauritius Island in 1985                                                                                                                                                           |
| <i>D. sechellia</i>    | GFP                                        | San Diego Stock Center #14021-0248.32<br><i>w</i> [1] ; pBac(3xP3-EGFPafm)::MCS::pW8 mini-white)                                                                                                  |
| <i>D. yakuba</i>       | Ivory Coast                                | Given by D. Stern. San Diego Stock Center #14021-0261.00<br>Collected from Ivory Coast in 1955                                                                                                    |
| <i>D. yakuba</i>       | 15.6.8                                     | Given by D. Matute. Isofemale stock, collected in São Tomé at altitude 110m in 2009 by D. Matute                                                                                                  |
| <i>D. yakuba</i>       | <i>yellow</i> [1]                          | San Diego Species Stock Center #14021-0261.05                                                                                                                                                     |
| <i>D. yakuba</i>       | 4.23.1                                     | Given by D. Matute. Isofemale stock, collected in São Tomé at altitude 1070m in 2009 by D. Matute                                                                                                 |
| <i>D. yakuba</i>       | LP1                                        | Given by D. Matute. Isofemale stock, collected in São Tomé at altitude 0m in 2009 by D. Matute                                                                                                    |
| <i>D. yakuba</i>       | 2.22.1                                     | Given by D. Matute. Isofemale stock, collected in São Tomé at                                                                                                                                     |

|                     |                |                                                                                                                                                       |
|---------------------|----------------|-------------------------------------------------------------------------------------------------------------------------------------------------------|
|                     |                | altitude 1250m in 2009 by D. Matute                                                                                                                   |
| <i>D. yakuba</i>    | PB1.4.21       | Given by D. Matute. Isofemale stock, collected in Bioko at altitude 1300m in 2009 by D. Matute                                                        |
| <i>D. santomea</i>  | SYN2005        | Given by D. Matute. Mix of six isofemale lines collected by J. Coyne at the field station Bom Sucesso (elevation 1,150 m) in 2005                     |
| <i>D. santomea</i>  | STO.4          | Given by D. Stern. San Diego Stock Center #14021-0271.00<br>Collected in São Tomé in 1998                                                             |
| <i>D. santomea</i>  | Quija 650.22   | Given by D. Matute. Isofemale stock, collected in São Tomé at altitude 650m in 2009 by D. Matute.                                                     |
| <i>D. santomea</i>  | Quija 650.37   | Given by D. Matute. Isofemale stock, collected in São Tomé at altitude 650m in 2005 by Lucio Primo Monteiro under the supervision of Daniel Lachaise. |
| <i>D. santomea</i>  | Quija 650.14   | Given by D. Matute. Isofemale stock, collected in São Tomé at altitude 650m in 2005 by Lucio Primo Monteiro under the supervision of Daniel Lachaise. |
| <i>D. santomea</i>  | BS14.1         | Given by D. Matute. Isofemale stock, collected in São Tomé at altitude 1150m in 2009 by D. Matute                                                     |
| <i>D. santomea</i>  | CAR1490.3      | Given by D. Matute. Isofemale stock, collected in São Tomé at altitude 1490m in 2009 by D. Matute                                                     |
| <i>D. santomea</i>  | B1300.13       | Given by D. Matute. Isofemale stock, collected in São Tomé at altitude 1300m in 2009 by D. Matute                                                     |
| <i>D. santomea</i>  | OBAT1200.3     | Given by D. Matute. Isofemale stock, collected in São Tomé at altitude 1200m in 2009 by D. Matute                                                     |
| <i>D. santomea</i>  | A1200.4        | Given by D. Matute. Isofemale stock, collected in São Tomé at altitude 1200m in 2009 by D. Matute                                                     |
| <i>D. santomea</i>  | C1350.14       | Given by D. Matute. Isofemale stock, collected in São Tomé at altitude 1350m in 2009 by D. Matute                                                     |
| <i>D. santomea</i>  | Rain42         | Given by D. Matute. Isofemale stock, collected in São Tomé at altitude 1240m in 2009 by D. Matute                                                     |
| <i>D. santomea</i>  | Field3.4       | Given by D. Matute. Isofemale stock, collected in São Tomé at altitude 1250m in 2009 by D. Matute                                                     |
| <i>D. teissieri</i> |                | Collected in Mt Selinda, Zimbabwe in 1970                                                                                                             |
| <i>D. teissieri</i> | #14021-0257.01 | San Diego Stock Center # 14021-0257.01                                                                                                                |
| <i>D. orena</i>     |                | Isofemale stock collected by J. David in 1975 in Cameroon                                                                                             |
| <i>D. erecta</i>    |                | Collected in La Lopé, Gabon by D. Lachaise in 2005                                                                                                    |
| <i>D. elegans</i>   |                | Given by B. Prud'homme. San Diego Stock Center # 14027-0461.03. Collected in Hong-Kong.                                                               |

1  
2  
3  
4  
5

**Table S2. Hypandrial bristle number in pure species and F1 hybrids**

<sup>0</sup>Flies raised at 25°C, <sup>1</sup>Flies raised at 29°C, <sup>2</sup>Flies raised at 18°C, <sup>3</sup>Flies raised at 21°C, <sup>4</sup>Flies raised at 14°C, <sup>5</sup>Flies collected directly from the wild.

|                                            | Number of Flies with 0 bristles | Number of Flies with 1 bristles | Number of Flies with 2 bristles | Number of Flies with 3 bristles | Total Number of Flies |
|--------------------------------------------|---------------------------------|---------------------------------|---------------------------------|---------------------------------|-----------------------|
| <b><i>D. melanogaster</i></b>              |                                 |                                 |                                 |                                 |                       |
| 3870 <sup>0</sup>                          | 0                               | 0                               | 20                              | 0                               | 20                    |
| 3844 <sup>0</sup>                          | 0                               | 0                               | 21                              | 0                               | 21                    |
| 3841 <sup>0</sup>                          | 0                               | 0                               | 21                              | 0                               | 21                    |
| 3852 <sup>0</sup>                          | 0                               | 0                               | 21                              | 0                               | 21                    |
| 3864 <sup>0</sup>                          | 0                               | 0                               | 22                              | 0                               | 22                    |
| T.7 <sup>0</sup>                           | 0                               | 0                               | 20                              | 0                               | 20                    |
| T.4 <sup>0</sup>                           | 0                               | 0                               | 19                              | 1                               | 20                    |
| 3875 <sup>0</sup>                          | 0                               | 0                               | 26                              | 0                               | 26                    |
| 3886 <sup>0</sup>                          | 0                               | 0                               | 19                              | 1                               | 20                    |
| T.1 <sup>0</sup>                           | 0                               | 0                               | 19                              | 1                               | 20                    |
| 3839 <sup>0</sup>                          | 0                               | 0                               | 20                              | 0                               | 20                    |
| 3846 <sup>0</sup>                          | 0                               | 0                               | 20                              | 0                               | 20                    |
| Sam <sup>0</sup>                           | 0                               | 0                               | 20                              | 0                               | 20                    |
| iso-1 <sup>0</sup>                         | 0                               | 6                               | 7                               | 1                               | 15                    |
| Canton-S <sup>0</sup>                      | 0                               | 0                               | 20                              | 0                               | 20                    |
| <b><i>D. sechellia</i> GFP<sup>0</sup></b> | 0                               | 0                               | 31                              | 0                               | 31                    |
| <b><i>D. mauritiana</i><sup>0</sup></b>    | 0                               | 0                               | 34                              | 0                               | 34                    |
| <b><i>D. mauritiana</i><sup>2</sup></b>    | 0                               | 0                               | 34                              | 0                               | 34                    |
| <b><i>D. simulans</i><sup>5</sup></b>      | 0                               | 0                               | 10                              | 0                               | 10                    |
| <b><i>D. yakuba</i></b>                    |                                 |                                 |                                 |                                 |                       |
| Ivory Coast <sup>0</sup>                   | 0                               | 0                               | 32                              | 0                               | 32                    |
| Ivory Coast <sup>2</sup>                   | 0                               | 0                               | 30                              | 0                               | 30                    |
| 4.23.1 <sup>1</sup>                        | 0                               | 0                               | 20                              | 0                               | 20                    |
| PB1.4.21 <sup>1</sup>                      | 0                               | 0                               | 25                              | 0                               | 25                    |
| LP1 <sup>1</sup>                           | 0                               | 0                               | 35                              | 0                               | 35                    |
| 2.22.1 <sup>1</sup>                        | 0                               | 0                               | 13                              | 0                               | 13                    |

|                                                                                                                |    |   |    |   |    |
|----------------------------------------------------------------------------------------------------------------|----|---|----|---|----|
| 15.6.8 <sup>1</sup>                                                                                            | 0  | 0 | 10 | 0 | 10 |
| <b><i>D. santomea</i></b>                                                                                      |    |   |    |   |    |
| SYN2005 <sup>0</sup>                                                                                           | 60 | 0 | 0  | 0 | 60 |
| SYN2005 <sup>2</sup>                                                                                           | 30 | 0 | 0  | 0 | 30 |
| STO.4 <sup>0</sup>                                                                                             | 29 | 0 | 0  | 0 | 29 |
| Quija 650.37 <sup>0</sup>                                                                                      | 30 | 0 | 0  | 0 | 30 |
| Quija 650.14 <sup>0</sup>                                                                                      | 35 | 0 | 0  | 0 | 35 |
| BS14.1 <sup>2</sup>                                                                                            | 22 | 0 | 0  | 0 | 22 |
| CAR1490.3 <sup>2</sup>                                                                                         | 21 | 0 | 0  | 0 | 21 |
| B1300.13 <sup>2</sup>                                                                                          | 20 | 0 | 0  | 0 | 20 |
| OBAT1200.3 <sup>2</sup>                                                                                        | 22 | 0 | 0  | 0 | 22 |
| A1200.4 <sup>2</sup>                                                                                           | 20 | 0 | 0  | 0 | 20 |
| C1350.14 <sup>2</sup>                                                                                          | 20 | 0 | 0  | 0 | 20 |
| Rain42 <sup>2</sup>                                                                                            | 23 | 0 | 0  | 0 | 23 |
| Field3.4 <sup>2</sup>                                                                                          | 21 | 0 | 0  | 0 | 21 |
| <b><i>D. teissieri</i></b> <sup>0</sup>                                                                        | 0  | 0 | 30 | 0 | 30 |
| <i>D. teissieri</i> <sup>2</sup>                                                                               | 0  | 0 | 30 | 0 | 30 |
| <b><i>D. orena</i></b> <sup>3</sup>                                                                            | 0  | 0 | 5  | 0 | 5  |
| <b><i>D. erecta</i></b> <sup>4</sup>                                                                           | 0  | 0 | 10 | 0 | 10 |
| <b><i>D. elegans</i></b> <sup>0</sup>                                                                          | 0  | 0 | 17 | 0 | 17 |
| <i>D. santomea/D. yakuba</i> F1 hybrids <sup>0</sup><br>( <i>D. santomea</i> females x <i>D. yakuba</i> males) | 0  | 2 | 32 | 0 | 34 |
| <i>D. santomea/D. yakuba</i> F1 hybrids <sup>0</sup><br>( <i>D. yakuba</i> females x <i>D. santomea</i> males) | 29 | 0 | 0  | 0 | 29 |
| <b><i>D. melanogaster/D. santomea</i> hybrids</b>                                                              |    |   |    |   |    |
| san/DC002 (1A1-1A1)                                                                                            | 19 | 4 | 1  | 0 | 24 |
| san/DC003 (1A1-1A1)                                                                                            | 15 | 7 | 2  | 0 | 24 |
| san/DC004 (1A1-1A3)                                                                                            | 18 | 6 | 0  | 0 | 24 |
| san/DC006 (1A3-1A8)                                                                                            | 18 | 3 | 3  | 0 | 24 |
| san/DC097 (1A7-1B4)                                                                                            | 8  | 9 | 7  | 0 | 24 |
| san/DC098 (1B2-1B8)                                                                                            | 19 | 3 | 2  | 0 | 24 |
| san/DC007 (1B1-1B5)                                                                                            | 18 | 5 | 1  | 0 | 24 |
| san/DC008 (1B4-1B10)                                                                                           | 21 | 2 | 1  | 0 | 24 |
| san/DC009 (1B9-1B13)                                                                                           | 18 | 4 | 2  | 0 | 24 |
| san/DC012 (1C3-1C5)                                                                                            | 17 | 5 | 2  | 0 | 24 |



|                     |    |    |   |   |    |
|---------------------|----|----|---|---|----|
| san/DC099 (1C3-1C4) | 21 | 3  | 0 | 0 | 24 |
| san/DC013 (1C4-1D2) | 16 | 8  | 0 | 0 | 24 |
| san/DC014 (1D1-1D2) | 20 | 4  | 0 | 0 | 24 |
| san/DC400 (1D2-1E1) | 19 | 3  | 2 | 0 | 24 |
| san/DC019 (1E1-1E3) | 18 | 5  | 1 | 0 | 24 |
| san/DC436 (1E3-1E5) | 22 | 0  | 2 | 0 | 24 |
| san/DC401 (2A2-2B1) | 21 | 3  | 0 | 0 | 24 |
| san/TM3 (control)   | 68 | 18 | 2 | 0 | 95 |

**Table. S3. *achaete-scute* mutant lines used.**

Coordinates are for *D. melanogaster* reference genome iso-1 (FB2013\_03, version 3). Based on restriction sites we estimated that point 0 of [60,61] corresponds to position 330342 in iso-1. Compared to other *D. melanogaster* strains, iso-1 contains a 6127-bp transposable element named 3S18{4/TE19523 at position 322,507-328,633. Coordinates were adjusted to account for the shift due to the transposable element.

| Name                                          | Origin and full genotype                                                                                                 | Description                                                                                                                                                                            |
|-----------------------------------------------|--------------------------------------------------------------------------------------------------------------------------|----------------------------------------------------------------------------------------------------------------------------------------------------------------------------------------|
| <i>sc</i> <sup>M6</sup>                       | Bloomington Stock Center #52668<br><i>sc[M6]/FM7i, P{w[+mC]=ActGFP}JMR3</i>                                              | Nonsense Glu114X mutation in <i>scute</i> .                                                                                                                                            |
| <i>ac</i> <sup>CAMI</sup>                     | Bloomington Stock Center #36540<br><i>y[1] P{w[+mW.hs]=GawB}CG32816[NP6014] ac[cam]</i>                                  | Deletion from 263861 to 264099, which includes nucleotides 28 to 265 of <i>achaete</i> coding sequence, and insertion of 21 bp at the same location (remains of an excised P-element). |
| <i>sc</i> <sup>6</sup>                        | Bloomington Stock Center #108<br><i>sc[6] w[a]</i>                                                                       | Deletion from between ca. 315550 and 316484 to between 338537 and 341499.                                                                                                              |
| <i>ase</i> <sup>1</sup>                       | Bloomington Stock Center #104<br><i>Df(1)ase-1, sc[ase-1] pn[1]/C(1)DX, y[1] f[1]</i>                                    | Deletion from between 341500 and 343845 to between 360269 and 360967.                                                                                                                  |
| <i>sc</i> <sup>5</sup>                        | Bloomington Stock Center #178<br><i>y[1] sc[5]</i>                                                                       | 1.2-kb deletion between 346503 and 347999.                                                                                                                                             |
| <i>ac</i> <sup>1</sup>                        | Bloomington Stock Center #8715<br><i>y[1] ac[1] w[1118]; P{w[+mC]=GAL4-ac.13}1</i>                                       | Deletion from ca. 242000 to between 257781 and 259255.                                                                                                                                 |
| <i>sc</i> <sup>1</sup>                        | Bloomington Stock Center #176<br><i>y[1] sc[1]</i>                                                                       | Gypsy insertion between 322067 and 322068.                                                                                                                                             |
| <i>ac</i> <sup>sbm</sup>                      | Given by P. Simpson.<br><i>ac[sbm]</i>                                                                                   | P element insertion between 264099 and 264100, after nucleotide 27 counting 5' from the <i>achaete</i> ATG.                                                                            |
| <i>ac</i> <sup>Hw-1</sup>                     | Bloomington Stock Center #109<br><i>Df(1)sc10-1, sc[10-1]/y[1] ac[Hw-1]</i><br>(this stock produces only [yellow] males) | Gypsy insertion between 264219 and 264671. Transcription of <i>achaete</i> terminates within Gypsy sequence. The resulting truncated transcript is overabundant compared to wildtype.  |
| <i>sc</i> <sup>29</sup>                       | Bloomington Stock Center #1442<br><i>In(1)sc[29], sc[29] w[a] eag[sc29]</i>                                              | Inversion. Left breakpoint is between 336621 and 337006.                                                                                                                               |
| <i>ac</i> <sup>1</sup> <i>sc</i> <sup>1</sup> | Bloomington Stock Center #4596<br><i>y[1] ac[1] sc[1] pn[1]</i>                                                          | See <i>ac</i> <sup>1</sup> and <i>sc</i> <sup>1</sup> .                                                                                                                                |
| <i>sc</i> <sup>H</sup>                        | Bloomington Stock Center #4055<br><i>C(1)DX, y[1] f[1]; T(1;4)sc[H], sc[H]</i>                                           | Transposition. Left breakpoint is between 317578 and 318088.                                                                                                                           |
| <i>sc</i> <sup>9</sup>                        | DGRC Kyoto Stock Center #102028<br><i>In(1)sc[9], sc[9] w[a] f[1] Bx[1]</i>                                              | Inversion. Left breakpoint is between 318656 and 320436.                                                                                                                               |

|                                                     |                                                                                                                                                                                     |                                                                                                                                                                                                                |
|-----------------------------------------------------|-------------------------------------------------------------------------------------------------------------------------------------------------------------------------------------|----------------------------------------------------------------------------------------------------------------------------------------------------------------------------------------------------------------|
| <i>sc</i> <sup>S2</sup>                             | Bloomington Stock Center #3333<br><i>T(1;2)sc[S2], y[+] sc[S2]: cn[1] M(2)53[1]/+;</i><br><i>CyO</i>                                                                                | Translocation associated with a deletion which is between 3.3 kb and 4.4 kb. Left breakpoint of the deletion is between 329,139 and 333,308. Minimal extent of the deletion is 330,042-333,308.                |
| <i>sc</i> <sup>7</sup>                              | Bloomington Stock Center #723<br><i>Df(1)B/In(1)sc[7], In(1)AM, sc[7] ptg[4]</i>                                                                                                    | Inversion associated with a deletion which is between 2.5 kb and 3.1 kb. Left breakpoint of the inversion is 37 kb 3' of the <i>sc</i> structural gene [62]. Minimal extent of the deletion is 332225- 336481. |
| <i>ac</i> <sup>3</sup><br><i>sc</i> <sup>10-1</sup> | Bloomington Stock Center #36541<br><i>In(1)ac[3], sc[10-1] ac[3] w[1] sable[1]/FM7i,</i><br><i>P{w[+mC]=ActGFP};JMR3</i>                                                            | Inversion whose left breakpoint is between 263169 and 264010 ( <i>ac</i> <sup>3</sup> ) and nonsense Glu163X mutation in <i>scute</i> ( <i>sc</i> <sup>10-1</sup> ).                                           |
| <i>sc</i> <sup>4</sup>                              | Bloomington Stock Center #789<br><i>In(1)sc[4], y[1] sc[4] ABO-X[1]</i>                                                                                                             | Inversion. Left breakpoint is 7 kb 3' of the <i>scute</i> transcribed region.                                                                                                                                  |
| <i>sc</i> <sup>8</sup>                              | Bloomington Stock Center #842<br><i>T(1;3)sc[260-15], sc[260-15]/FM6 B[1] dm[1]</i><br><i>sc[8] y[31d]</i><br>(this stock produces only [Bar] males)                                | Inversion. Left breakpoint is between 275383 and 276564.                                                                                                                                                       |
| <i>ac</i> <sup>1</sup><br><i>sc</i> <sup>19</sup>   | DGRC Kyoto Stock Center #107246<br>(ordered from Bloomington Stock Center with ancient number #3822)<br><i>Df(1)sc[19]/y[1] ac[1]; Dp(1;2)sc[19]/In(2L)Cy,</i><br><i>S[2] Cy[1]</i> | See also <i>ac</i> <sup>1</sup> . Translocation. Left breakpoint is ca. 343845.                                                                                                                                |

1  
2  
3

**Table S4. Hypandrial bristle number in *achaete-scute* mutants**

|                                                           | Number of Flies with 0 bristles | Number of Flies with 1 bristles | Number of Flies with 2 bristles | Number of Flies with 3 bristles | Total Number of Flies |
|-----------------------------------------------------------|---------------------------------|---------------------------------|---------------------------------|---------------------------------|-----------------------|
| <b>Null Mutations (Coding)</b>                            |                                 |                                 |                                 |                                 |                       |
| <i>sc<sup>M6</sup></i>                                    | 15                              | 0                               | 0                               | 0                               | 15                    |
| <i>ac<sup>CAMI</sup></i>                                  | 0                               | 0                               | 15                              | 0                               | 15                    |
| <b>Deletions (Cis-Regulatory)</b>                         |                                 |                                 |                                 |                                 |                       |
| <i>sc<sup>6</sup></i>                                     | 16                              | 0                               | 0                               | 0                               | 16                    |
| <i>ase<sup>1</sup></i>                                    | 0                               | 3                               | 12                              | 1                               | 16                    |
| <i>sc<sup>5</sup></i>                                     | 0                               | 0                               | 17                              | 0                               | 17                    |
| <i>ac<sup>1</sup></i>                                     | 0                               | 0                               | 10                              | 0                               | 10                    |
| <b>Insertions</b>                                         |                                 |                                 |                                 |                                 |                       |
| <i>sc<sup>1</sup></i>                                     | 17                              | 0                               | 0                               | 0                               | 17                    |
| <i>ac<sup>sbm</sup></i>                                   | 1                               | 0                               | 14                              | 0                               | 15                    |
| <i>ac<sup>Hw-1</sup></i>                                  | 0                               | 0                               | 15                              | 0                               | 15                    |
| <b>Complex changes (inversions, translocations, etc.)</b> |                                 |                                 |                                 |                                 |                       |
| <i>sc<sup>29</sup></i>                                    | 16                              | 0                               | 0                               | 0                               | 16                    |
| <i>ac<sup>1</sup> sc<sup>1</sup></i>                      | 15                              | 0                               | 0                               | 0                               | 15                    |
| <i>sc<sup>H</sup></i>                                     | 6                               | 0                               | 0                               | 0                               | 6                     |
| <i>sc<sup>9</sup></i>                                     | 15                              | 0                               | 0                               | 0                               | 15                    |
| <i>sc<sup>S2</sup></i>                                    | 5                               | 0                               | 0                               | 0                               | 5                     |
| <i>sc<sup>7</sup></i>                                     | 14                              | 0                               | 0                               | 0                               | 14                    |
| <i>ac<sup>3</sup> sc<sup>10-1</sup></i>                   | 14                              | 0                               | 0                               | 0                               | 14                    |
| <i>sc<sup>4</sup></i>                                     | 13                              | 0                               | 0                               | 0                               | 13                    |
| <i>sc<sup>8</sup></i>                                     | 0                               | 0                               | 23                              | 0                               | 23                    |
| <i>ac<sup>1</sup> sc<sup>19</sup></i>                     | 0                               | 0                               | 8                               | 0                               | 8                     |

4

1  
2  
3  
4  
5  
6  
7  
8

**Table S5. Test of various *UAS*-reporter constructs with *DC-GAL4***

The number of adults (males and females) with *singed/forked*/absent dorsocentral thoracic bristles is shown for various *UAS-RNAi* reporter lines. The phenotype was recorded individually for each of the four dorsocentral bristles: AL: anterior left, AR: anterior right, PL: posterior left, PR: posterior right. *Dcr2*: *UAS-Dicer-2*, WT: wild-type bristle phenotype. Crosses were performed at 25°C and at 29°C for each genotype.

| Bristles displaying a mutant phenotype           |       | AL  | AL | AL | AL | AL | AL | AL | AL | AL | AL | AL | AL | AL | AL | AL | WT  | Total Number of Flies |
|--------------------------------------------------|-------|-----|----|----|----|----|----|----|----|----|----|----|----|----|----|----|-----|-----------------------|
|                                                  |       | AR  | AR | AR | AR | AR | AR | AR | AR | AR | AR | AR | AR | AR | AR | AR |     |                       |
| <i>Dcr2</i> ;<br><i>singed</i> <sup>105747</sup> | 25 °C | 22  | 20 | 22 |    |    | 12 |    | 1  | 7  |    |    | 1  | 3  |    |    | 8   | 88                    |
|                                                  | 29 °C | 69  | 11 | 13 |    |    | 3  |    |    |    |    |    |    | 1  |    |    | 1   | 98                    |
| <i>Dcr2</i> ;<br><i>forked</i> <sup>103813</sup> | 25 °C | 15  | 18 | 22 |    |    | 14 | 2  | 2  | 2  |    |    | 3  | 6  | 5  | 6  | 44  | 139                   |
|                                                  | 29 °C | 123 | 33 | 36 |    |    | 15 |    | 1  | 1  |    |    |    |    |    | 1  | 5   | 215                   |
| <i>Dcr2</i> ;<br><i>forked</i> <sup>33200</sup>  | 25 °C |     | 48 |    |    |    |    |    |    |    |    |    | 3  | 3  |    |    | 46  | 100                   |
|                                                  | 29 °C | 64  | 28 | 22 |    |    | 61 |    | 1  |    |    |    | 3  | 2  |    |    | 3   | 183                   |
| <i>Dcr2</i> ;<br><i>forked</i> <sup>24632</sup>  | 25 °C |     |    |    |    |    |    |    |    |    |    |    |    | 1  |    |    | 154 | 155                   |
|                                                  | 29 °C |     |    |    |    |    |    |    | 1  |    |    |    |    |    | 1  |    | 175 | 177                   |
| <i>Dcr2</i> ;<br><i>singed</i> <sup>32579</sup>  | 25 °C |     |    |    |    |    |    |    |    |    |    |    |    |    |    |    | 151 | 151                   |
|                                                  | 29 °C |     |    |    |    |    |    |    |    |    |    |    |    |    |    |    | 217 | 217                   |
| <i>Dcr2</i> ;<br><i>ac</i> <sup>100647</sup>     | 25 °C |     |    |    |    |    |    |    |    |    |    |    |    |    |    |    | 136 | 136                   |
|                                                  | 29 °C |     |    |    |    |    |    |    |    |    |    |    |    |    |    |    | 258 | 258                   |
| <i>Dcr2</i> ;<br><i>sc</i> <sup>105951</sup>     | 25 °C |     |    |    |    |    |    |    |    |    |    |    |    |    |    |    | 77  | 77                    |
|                                                  | 29 °C |     |    |    |    |    |    |    |    |    |    |    |    |    |    |    | 113 | 113                   |

9

1  
2  
3  
4  
5  
6  
7  
8  
9  
10  
11  
12  
13

**Table S6. *Achaete-scute GAL4* lines and their hypandrial bristle phenotype with *Dcr2*; *UAS-singed.RNAi*<sup>105747</sup>.**

Lines are ordered according to their left coordinates (Release 5). The origin of each *GAL4* line is indicated by a letter code: V: Vienna Drosophila Research Center [63], J: Janelia Farm [38], S: This Study. The orientation of the *scute* cis-regulatory region within the reporter construct is indicated by + or -. N: no data, I: determined by PCR in this study. In bold are the 3 *GAL4* lines which produce a hypandrial bristle mutant phenotype. For short, *GMR15E09*, *GMR18C05* and *VT054839* are named *15E09*, *18C05* and *054839* in the main text, respectively. Comparison of the *VT085439* cis-regulatory element from *D. santomea* and *D. yakuba* revealed no difference when tested in *GAL4* reporter lines with *Dcr2*; *UAS-singed.RNAi*<sup>105747</sup> (last two columns).

| Name            | Origin   | Orien tation | Coordinates               | Number of Flies with 0 singed bristles | Number of Flies with 1 singed bristles | Number of Flies with 2 singed bristles | Total Number of Flies |
|-----------------|----------|--------------|---------------------------|----------------------------------------|----------------------------------------|----------------------------------------|-----------------------|
| VT054793        | V        | -            | X: 252,196-250,097        | 5                                      | 0                                      | 0                                      | 5                     |
| VT054794        | V        | +            | X: 251,577-253,760        | 5                                      | 0                                      | 0                                      | 5                     |
| VT054795        | V        | +            | X: 255,238-257,329        | 5                                      | 0                                      | 0                                      | 5                     |
| VT054796        | V        | +            | X: 256,878-259,056        | 5                                      | 0                                      | 0                                      | 5                     |
| VT054798        | V        | -            | X: 262,456-260,258        | 5                                      | 0                                      | 0                                      | 5                     |
| VT054799        | V        | +            | X: 261,978-264,142        | 5                                      | 0                                      | 0                                      | 5                     |
| GMR14C10        | J        | N            | X: 265,138-267,274        | 5                                      | 0                                      | 0                                      | 5                     |
| GMR15B10        | J        | N            | X: 266,123-269,675        | 5                                      | 0                                      | 0                                      | 5                     |
| GMR15C11        | J        | N            | X: 269,057-272,751        | 5                                      | 0                                      | 0                                      | 5                     |
| GMR15X09        | S        | +            | X: 271,792-275,220        | 5                                      | 0                                      | 0                                      | 5                     |
| VT054805        | V        | +            | X: 273,824-275,941        | 5                                      | 0                                      | 0                                      | 5                     |
| GMR15A01        | J        | N            | X: 277,456-280,802        | 5                                      | 0                                      | 0                                      | 5                     |
| GMR14C12        | J        | N            | X: 276,489-278,649        | 5                                      | 0                                      | 0                                      | 5                     |
| GMR15A04        | J        | N            | X: 277,456-280,802        | 6                                      | 0                                      | 0                                      | 6                     |
| GMR15C10        | J        | N            | X: 280,274-283,966        | 5                                      | 0                                      | 0                                      | 5                     |
| GMR15E07        | J        | N            | X: 282,747-286,633        | 5                                      | 0                                      | 0                                      | 5                     |
| <b>GMR15E09</b> | <b>J</b> | <b>-</b>     | <b>X: 289,793-285,861</b> | <b>0</b>                               | <b>0</b>                               | <b>6</b>                               | <b>6</b>              |
| GMR13D04        | J        | N            | X: 291,606-295,262        | 5                                      | 0                                      | 0                                      | 5                     |
| GMR13C08        | J        | N            | X: 294,631-298,184        | 5                                      | 0                                      | 0                                      | 5                     |
| GMR12H02        | J        | N            | X: 297,331-300,499        | 5                                      | 0                                      | 0                                      | 5                     |
| GMR13B12        | J        | N            | X: 299,747-303,236        | 6                                      | 0                                      | 0                                      | 6                     |

|                 |          |            |                            |          |          |          |          |
|-----------------|----------|------------|----------------------------|----------|----------|----------|----------|
| VT054820        | V        | -          | X: 303,848-301,726         | 6        | 0        | 0        | 6        |
| VT054821        | V        | -          | X: 306,956- 304,793        | 6        | 0        | 0        | 6        |
| VT054822b       | S        | N          | X :308,704- 306,743        | 7        | 0        | 0        | 7        |
| VT054823        | V        | +          | X: 308,224- 310,380        | 9        | 0        | 0        | 9        |
| VT054824        | V        | -          | X: 312,108- 310,003        | 7        | 0        | 0        | 7        |
| VT054825        | V        | +          | X: 311,767- 313,924        | 6        | 0        | 0        | 6        |
| VT054826        | V        | -          | X: 315,628- 313,523        | 6        | 0        | 0        | 6        |
| VT054827        | V        | +          | X: 315,231- 317,337        | 7        | 0        | 0        | 7        |
| VT054828        | V        | -          | X: 319,149- 316,931        | 15       | 0        | 0        | 15       |
| VT054829        | V        | -          | X: 320,924- 318,733        | 12       | 0        | 0        | 12       |
| VT054831        | V        | +          | X: 328,588- 330,249        | 8        | 0        | 0        | 8        |
| VT054832        | V        | -          | X: 333,580- 331,369        | 6        | 0        | 0        | 6        |
| GMR18G09        | J        | N          | X: 332,537-335,588         | 5        | 0        | 0        | 5        |
| VT054833        | V        | -          | X: 335,283- 333,110        | 7        | 0        | 0        | 7        |
| GMR18E07        | J        | N          | X: 334,502-337,059         | 5        | 0        | 0        | 5        |
| VT054834        | V        | +          | X: 334,894- 337,095        | 6        | 0        | 0        | 6        |
| GMR19D04        | J        | +/I        | X: 336,372-340,205         | 5        | 0        | 0        | 5        |
| VT054835        | V        | +          | X: 336,673-338,747         | 7        | 0        | 0        | 7        |
| VT054836        | V        | -          | X: 340,523- 338,435        | 5        | 0        | 0        | 5        |
| <b>GMR18C05</b> | <b>J</b> | <b>-/I</b> | <b>X: 341,372- 339,336</b> | <b>0</b> | <b>0</b> | <b>6</b> | <b>6</b> |
| GMR19B11        | J        | +/I        | X: 340,180-343,911         | 6        | 0        | 0        | 6        |
| VT054838        | V        | +          | X: 341,960- 344,040        | 5        | 0        | 0        | 5        |
| GMR18G07        | J        | +/I        | X: 343,240-346,246         | 6        | 0        | 0        | 6        |
| <b>VT054839</b> | <b>V</b> | <b>+</b>   | <b>X: 343,684- 345,799</b> | <b>0</b> | <b>0</b> | <b>5</b> | <b>5</b> |
| GMR18F05        | J        | N          | X: 345,467-348,263         | 5        | 0        | 0        | 5        |
| VT054840        | V        | -          | X: 347,574- 345,470        | 5        | 0        | 0        | 5        |
| VT054841        | V        | -          | X: 349,308- 347,221        | 7        | 0        | 0        | 7        |
| GMR19A06        | J        | N          | X: 347,473-350,875         | 5        | 0        | 0        | 5        |
| VT054842        | V        | -          | X: 351,081- 348,769        | 5        | 0        | 0        | 5        |
| GMR18E10        | J        | N          | X: 349,909-352,526         | 5        | 0        | 0        | 5        |
| VT054843        | V        | -          | X: 352,807- 350,712        | 7        | 0        | 0        | 7        |
| GMR20B05        | J        | N          | X: 351,638-353,720         | 5        | 0        | 0        | 5        |
| VT054845        | V        | +          | X: 357,132- 359,309        | 5        | 0        | 0        | 5        |
| VT054846        | V        | -          | X: 360,191- 358,098        | 8        | 0        | 0        | 8        |

|                        |   |   |                 |   |   |   |    |
|------------------------|---|---|-----------------|---|---|---|----|
| VT054839mel<br>-BL2057 | S | + | Does not apply. | 1 | 2 | 2 | 5  |
| VT054839yak            | S | + | Does not apply. | 7 | 4 | 7 | 18 |
| VT054839san            | S | + | Does not apply. | 7 | 8 | 5 | 20 |



1  
2  
3  
4

**Table S7. Primers used.**

All primers were purchased from Sigma Aldrich.

| Name                          | Sequence                              |
|-------------------------------|---------------------------------------|
| 15X09FF                       | CACCTT TCG CGA TGC AGG GAG AAA GTG A  |
| 15X09RR                       | ATG CTG CGC AGC GTG AGA AAA TGC A     |
| VT054822bisF                  | CACCAAC GGA TTG GCG TGT TAA CCA GCG A |
| VT054822bisR                  | AAG CGG AAG AGG TAT CGG TGT CCT T     |
| VT054839FF                    | CACCGGCAACTTTCAGCTCAGTTATGTCA         |
| VT054839RR                    | CAT CGT CGC AGC GGG AAT ATG AAT T     |
| 18C05FDsanyak                 | CACCGAGTGAGTGGACCGCTATTTGTACA         |
| 18C05Rsanyak                  | GAGCTGTTTGCTATCGGGGTGCGA              |
| 18C05FDmel                    | CACCGAATGAGTGGACCGCTATTTGTACA         |
| 18C05Rmel                     | CAAGCCGTTTTCTTTGAGGTGTCT              |
| 18C05bDF                      | CACCCGAGTGCAGACACACAGACAGGTCT         |
| 18C05dDF                      | CACCGTTCGCGGACCTAAGCCGCTTAAGT         |
| 18C05aR                       | TTG AGT TCC CCT TGG CCG CTG TGA A     |
| 18C05cR                       | TCT GCT GCT CCC GTT GAT GGT GTT G     |
| 18C05bF2                      | CACCTG AAA ACG GAT CGA AAC GGC GAG T  |
| 18C05cR2                      | GGT GTT GAT TGT GCG CCA GTC AAG T     |
| 18C05aR2mel                   | AAGCAGCTAAGCCTAGAACCCTGTTAC           |
| Scute-CDS-FOR                 | GGTACCTGTTGATCGTTMTCCGGAA             |
| Scute-CDS-FOR                 | AAGCTTAGTCACTGCTCCTGCCATAG            |
| VT054838 forward              | CTCCCCAGACTAACCCACTC                  |
| VT054838 reverse              | AGCACAAAAGGGCAGGAAC                   |
| GAL4 forward                  | CGAACAAGCATGCGATATTT                  |
| GAL4 reverse                  | GCTGCCGAGTCAATCGATAC                  |
| VT054839 forward              | GGTGCATCCATCCATTCCT                   |
| VT054839 reverse              | GCGGGAATATGAATTTTATGTAGA              |
| Gal4 lines sequencing forward | ACAAGTTTGTACAAAAAAGCAGGCT             |
| VT054836 forward              | GACCTATGCACCAGCCATTT                  |
| VT054836 reverse              | CGCACCGGACTTTTAATTTG                  |
| GMR15E09 forward              | GGTGGACTCCGTTTCAGGT                   |
| GMR15E09 reverse              | GCCGAACGGCAATAAAGTAA                  |

|                               |                                                                                                                                |
|-------------------------------|--------------------------------------------------------------------------------------------------------------------------------|
| PBPGUw-GIBSON-For             | ATAGGGGTTCGCGCACAT                                                                                                             |
| PBPGUw-GIBSON-Rev             | CTTTTATACCGCTGCGCTCGAT                                                                                                         |
| San18C05_1-1070-Rev           | ATTGCCAACTGTCCAAGAAGTC                                                                                                         |
| Yak18C05_1021-2085-For        | AAAGGAATTGTACGCAGCCAAG                                                                                                         |
| San18C05_1-1609-Rev           | TTCGGCCAAAATTGATGAG                                                                                                            |
| Yak18C05_1571-2085-For        | TGGCATTGTGTGTTCTCTGTG                                                                                                          |
| Yak18C05_1-550-Rev            | TAATTTGGGCCCCCGTGGGA                                                                                                           |
| San18C05_500-2079-For         | TTTATTTATTTGCGGACTCAGA                                                                                                         |
| San18C05_1-550-Rev            | ACCGGACTTTTAATTTGGGCCCCCGTGGGA                                                                                                 |
| Yak18C05_551-2085-For         | GCCCAAATTAAGTCCGGTGCGCCCAA                                                                                                     |
| Yak18C05_1-1550-Rev_1         | AGGTAATCAAGTCACATTGCAGTTGTTTGC                                                                                                 |
| San18C05_1489-2079-For        | GCAATGTGACTTGATTACCTCATTTAATTGAATG                                                                                             |
| Yak_1078-2086_San-SNP970-Rev  | acctggctctTAACTAAATTGCTGCCCCGAAC                                                                                               |
| Yak_1-1078_San-SNP970-For     | caatttagttAAGAGCCAGGTACGCGCTA                                                                                                  |
| Yak_1535-2086_San-SNP1429-Rev | ccaaagaaggcaaCATTTATTTCCGTGATACAATAAAGCTG                                                                                      |
| Yak_1-1535_San-SNP1429-For    | ggaaataaatGCTGCCTTCTTTGGAAATAGTAG                                                                                              |
| Yak_1613-2086-San-SNP1507-Rev | aattaaatgaggCAATCAAGTCACATTGCAGTTGTTTACC                                                                                       |
| Yak_1-1613-San-SNP1507-For    | gtgacttgattGCCTCATTTAATTGAATGTTTAACTC                                                                                          |
| Yak_1880-2086-San-SNP1775-Rev | caaagtcaaataCAAGAACGGTACATTGGTGGC                                                                                              |
| Yak_1-1880-San-SNP1775-For    | taccgttttGTATTTGACTTTGTTACGCC                                                                                                  |
| San-Yak_lines_sequencing-For  | AATGGGTCACCCCGTGTA                                                                                                             |
| San-Yak_lines_sequencing-Rev  | GGTCTCTCAGGGTTTTCAAGC                                                                                                          |
| EMSA_Yak_1775-For             | GTACCGTTTCTTTTATTTGACTTTG                                                                                                      |
| EMSA_San_T1775G-For           | GTACCGTTTCTTGTATTTGACTTTG                                                                                                      |
| EMSA_1775-Rev                 | TCTTGTTATTATTCCGAGGTG                                                                                                          |
| 18C05_Ancestral_Gibson-for    | TTCCCCGAAAAGTGCCACCTGACGTCTAAGAAACCATT<br>ATTATCATGACATTAACCTATAAAAATAGGCGTATCACGA<br>GGCCCTTTCGTCTTCAAGAATTCGTTTATCACAAAGTTTG |
| 18C05_Ancestral_Gibson-rev    | TCGATCCCCGGGCGAGCTCGGCCGGCCGTTTATCACCA<br>CTTTG                                                                                |

1

2 **Table S8. PCR fragments cloned into pENTR/D-TOPO**

3

4

| Fragment | Template                     | Forward primer | Reverse primer |
|----------|------------------------------|----------------|----------------|
| 15X09    | <i>D. melanogaster</i> iso-1 | 15X09FF        | 15X09RR        |

|                    |                              |               |              |
|--------------------|------------------------------|---------------|--------------|
| VT054822b          | <i>D. melanogaster</i> iso-1 | VT054822bisF  | VT054822bisR |
| VT054839yak        | <i>D. yakuba</i> Ivory Coast | VT054839FF    | VT054839RR   |
| VT054839san        | <i>D. santomea</i> SYN2005   | VT054839FF    | VT054839RR   |
| 18C05_T7           | <i>D. melanogaster</i> T7    | 18C05FDmel    | 18C05Rmel    |
| 18C05_BL2057       | <i>D. melanogaster</i> iso-1 | 18C05FDmel    | 18C05Rmel    |
| 18C05Yakfull       | <i>D. yakuba</i> Ivory Coast | 18C05FDsanyak | 18C05Ryaksan |
| 18C05Sanfull       | <i>D. santomea</i> SYN2005   | 18C05FDsanyak | 18C05Ryaksan |
| 18C05AmelBL        | <i>D. melanogaster</i> iso-1 | 18C05FDmel    | 18C05aR2mel  |
| 18C05BmelBL        | <i>D. melanogaster</i> iso-1 | 18C05bF2      | 18C05cR2     |
| 18C05CmelBL        | <i>D. melanogaster</i> iso-1 | 18C05dDF      | 18C05Rmel    |
| 18C05ABmelBL       | <i>D. melanogaster</i> iso-1 | 18C05FDmel    | 18C05cR      |
| 18C05BCmelBL       | <i>D. melanogaster</i> iso-1 | 18C05bDF      | 18C05Rmel    |
| 18C05Asan          | <i>D. santomea</i> SYN2005   | 18C05FDsanyak | 18C05aR      |
| 18C05Bsan          | <i>D. santomea</i> SYN2005   | 18C05bDF      | 18C05cR2     |
| 18C05Ayak          | <i>D. yakuba</i> Ivory Coast | 18C05FDsanyak | 18C05aR      |
| 18C05Byak          | <i>D. yakuba</i> Ivory Coast | 18C05bF2      | 18C05cR2     |
| 18C05Cyak          | <i>D. yakuba</i> Ivory Coast | 18C05dDF      | 18C05Ryaksan |
| VT054839mel-BL2057 | <i>D. melanogaster</i> iso-1 | VT054839FF    | VT054839RR   |
| VT054839yak        | <i>D. yakuba</i> Ivory Coast | VT054839FF    | VT054839RR   |
| VT054839san        | <i>D. santomea</i> SYN2005   | VT054839FF    | VT054839RR   |

1  
2  
3

**Table S9. PCR fragments used for Gibson assembly into pBPSUw**

| #   | Fragment name              | Template                      | Forward primer            | Reverse primer                |
|-----|----------------------------|-------------------------------|---------------------------|-------------------------------|
| 1.  | San_1-1500                 | 18C05_san_full-pBPSUw         | PBPGUw-GIBSON-For         | San18C05_1-1609bp-Rev         |
| 2.  | Yak_1500-2085              | 18C05_yak_full-pBPSUw         | Yak18C05_1571-2085-For    | PBPGUw-GIBSON-Rev             |
| 3.  | Yak_1-1000                 | 18C05_yak_full-pBPSUw         | PBPGUw-GIBSON-For         | San18C05_1-1070-Rev           |
| 4.  | San_1000-2085              | 18C05_san_full-pBPSUw         | Yak18C05_1021-2085-For    | PBPGUw-GIBSON-Rev             |
| 5.  | San_1-1000+Yak1001-1500    | San1-1000+Yak1001-2085-pBPGUw | PBPGUw-GIBSON-For         | San18C05_1-1609-Rev           |
| 6.  | San_1500-2079              | 18C05_san_full-pBPSUw         | Yak18C05_1571-2085-For    | PBPGUw-GIBSON-Rev             |
| 7.  | San_1-500                  | 18C05_san_full-pBPSUw         | PBPGUw-GIBSON-For         | San18C05_1-550-Rev            |
| 8.  | Yak_500-2085               | 18C05_yak_full-pBPSUw         | Yak18C05_551-2085-For     | PBPGUw-GIBSON-Rev             |
| 9.  | Yak_1-1500                 | 18C05_yak_full-pBPSUw         | PBPGUw-GIBSON-For         | Yak18C05_1-1550-Rev_1         |
| 10. | San_1500-2079              | 18C05_san_full-pBPSUw         | San18C05_1489-2079-For    | PBPGUw-GIBSON-Rev             |
| 11. | San_1-1000                 | 18C05_san_full-pBPSUw         | PBPGUw-GIBSON-For         | San18C05_1-1070-Rev           |
| 12. | Yak_1001-2085              | 18C05_yak_full-pBPSUw         | Yak18C05_1021-2085-For    | PBPGUw-GIBSON-Rev             |
| 13. | San_1001-1500+Yak1501-2085 | San1-1500+Yak1501-2085-pBPSUw | Yak18C05_1021-2085-For    | PBPGUw-GIBSON-Rev             |
| 14. | Yak_1-500                  | 18C05_yak_full-pBPSUw         | PBPGUw-GIBSON-For         | Yak18C05_1-550-Rev            |
| 15. | San_501-1500               | 18C05_san_full-pBPSUw         | San18C05_500-2079bp-For   | San18C05_1-1609-Rev           |
| 16. | San_501-1000               | 18C05_san_full-pBPSUw         | San18C05_500-2079-For     | San18C05_1-1070-Rev           |
| 17. | SNP-970/1                  | 18C05_yak_full-pBPSUw         | PBPGUw-GIBSON-For         | Yak_1078-2086_San-SNP970-Rev  |
| 18. | SNP-970/2                  | 18C05_yak_full-pBPSUw         | Yak_1-1078_San-SNP970-For | PBPGUw-GIBSON-Rev             |
| 19. | SNP-1429/1                 | 18C05_yak_full-pBPSUw         | PBPGUw-GIBSON-For         | Yak_1535-2086_San-SNP1429-Rev |
| 20. | SNP-1429/2                 | 18C05_yak_full-               | Yak_1-1535_San-           | PBPGUw-GIBSON-Rev             |

|     |            |                       |                            |                               |
|-----|------------|-----------------------|----------------------------|-------------------------------|
|     |            | pBPSUw                | SNP1429-For                |                               |
| 21. | SNP-1507/1 | 18C05_yak_full-pBPSUw | PBPGUw-GIBSON-For          | Yak_1613-2086-San-SNP1507-Rev |
| 22. | SNP-1507/2 | 18C05_yak_full-pBPSUw | Yak_1-1613-San-SNP1507-For | PBPGUw-GIBSON-Rev             |
| 23. | SNP-1775/1 | 18C05_yak_full-pBPSUw | PBPGUw-GIBSON-For          | Yak_1880-2086-San-SNP1775-Rev |
| 24. | SNP-1775/2 | 18C05_yak_full-pBPSUw | Yak_1-1880-San-SNP1775-For | PBPGUw-GIBSON-Rev             |

1

2

### Table S10. Scheme of Gibson assembly for chimeric constructs

3

See Table S9. for description of the PCR fragments.

4

| Construct Name  | Assembled PCR Fragments |
|-----------------|-------------------------|
| 18C05_SSSY      | 1+2                     |
| 18C05_YYSS      | 3+4                     |
| 18C05_SSYS      | 5+6                     |
| 18C05_SYYY      | 7+8                     |
| 18C05_YYYS      | 9+10                    |
| 18C05_SSY Y     | 11+12                   |
| 18C05_YYSY      | 3+13                    |
| 18C05_YSYY      | 14+16+12                |
| 18C05_YSSY      | 14+15+2                 |
| 18C05yakT970A   | 17+18                   |
| 18C05YyakT1429G | 19+20                   |
| 18C05yakA1507G  | 21+22                   |
| 18C05yakt1775G  | 23+24                   |

5

6

### Table S11. List of *18C05yakuba*- and *18C05ancestral-SNP-pBPSUw* constructs synthesized by GenScript

7

8

| Name                   | Construction                                                      |
|------------------------|-------------------------------------------------------------------|
| 18C05_Anc-pBPSUw       | Ordered at GenScript                                              |
| 18C05_AncT1008C-pBPSUw | Ordered at GenScript, nucleotide T at position 1008 replaced to C |
| 18C05_AncT1429G-pBPSUw | Ordered at GenScript, nucleotide T at position 1429 replaced to G |
| 18C05_AncT1482C-pBPSUw | Ordered at GenScript, nucleotide T at position 1482 replaced to C |
| 18C05_AncA1507G-pBPSUw | Ordered at GenScript, nucleotide A at position 1507 replaced to C |
| 18C05_AncT1775G-pBPSUw | Ordered at GenScript, nucleotide T at position 1775 replaced to C |
| 18C05_yakG869A-pBPSUw  | Ordered at GenScript, nucleotide G at position 869 replaced to A  |

|                         |                                                                                                                                                                                           |
|-------------------------|-------------------------------------------------------------------------------------------------------------------------------------------------------------------------------------------|
| 18C05_yakT1008C-pBPSUw  | pUC57 was ordered at GenScript and subcloned into pBPSUw using Gibson Assembly, nucleotide T at position 1008 replaced to C                                                               |
| 18C05_yakT1482C-pBPSUw  | pUC57 was ordered at GenScript and subcloned into pBPSUw using Gibson Assembly, nucleotide T at position 1482 replaced to C                                                               |
| 18C05_AncG869A-pBPSUw   | pUC57 was ordered at GenScript and subcloned into pBPSUw using Gibson Assembly, nucleotide G at position 869 replaced to A                                                                |
| 18C05_AncT670G-pBPSUw   | pUC57 was ordered at GenScript and subcloned into pBPSUw using Gibson Assembly, nucleotide T at position 670 replaced to G                                                                |
| 18C05_Anc-SNPall-pBPSUw | pUC57 was ordered at GenScript and subcloned into pBPSUw using Gibson Assembly, nucleotide substitutions at the indicated positions: T670G, G869A, T1008C, T1429G, T1482C, A1507G, T1775G |

1

2 **Table S12. JASPAR binding scores for 6 loci of interest within the *18C05* region**

3 Predicted transcription factors (TF) binding sites and their binding scores are shown for 3 loci of  
 4 interest within the *18C05* region which underwent *D. santomea*-specific substitutions associated with a  
 5 decrease in hypandrial bristle number. For each position the left column indicates binding scores for the  
 6 *D. yakuba* sequence and the right column for the *D. santomea* sequence. All the TF predicted by  
 7 JASPAR with binding scores higher than 0.9 for at least one locus are shown. “-” indicates cases where  
 8 binding scores of the *D. yakuba* sequence is less than 0.9. In red are binding scores that were changed  
 9 by the mutation. We found for T1429G a gain of two repressors (B-H1 and B-H2), for A1507G a loss  
 10 of several TF binding sites (AWH, DDX, LBE, LBL, LIM3 and VVL), for T1775G a gain of ARA and  
 11 MIRR binding and a loss of BR-Z and ABD-B binding sites.  
 12

| TF         | 1429<br>(yak) | T1429G<br>(san) | 1507<br>(yak) | A1507G<br>(san) | 1775<br>(yak) | T1775G<br>(san) |
|------------|---------------|-----------------|---------------|-----------------|---------------|-----------------|
| Abd_B      | -             | -               | -             | -               | 0.92          | <b>0.78</b>     |
| ara        | -             | -               | -             | -               | 0.73          | <b>0.95</b>     |
| Awh        | -             | -               | 0.94          | <b>0.85</b>     | -             | -               |
| B-H1       | 0.64          | <b>0.93</b>     | -             | -               | -             | -               |
| B-H2       | 0.67          | <b>0.91</b>     | -             | -               | -             | -               |
| Br-Z2      | -             | -               | -             | -               | 0.9           | <b>0.62</b>     |
| CG1569G-RA | -             | -               | 0.94          | 0.94            | -             | -               |
| Dbx        | -             | -               | 0.94          | <b>0.87</b>     | -             | -               |
| lbe        | -             | -               | 0.95          | <b>0.74</b>     | -             | -               |
| lbl        | -             | -               | 0.93          | <b>0.74</b>     | -             | -               |
| Lim3       | -             | -               | 0.92          | <b>0.85</b>     | -             | -               |
| mirr       | -             | -               | -             | -               | 0.71          | <b>0.93</b>     |
| onecut     | -             | -               | 0.99          | 0.98            | -             | -               |
| vvl        | -             | -               | 0.92          | <b>0.83</b>     | -             | -               |

13

1  
2  
3  
4  
5  
6  
7  
8  
9

**Table S13. Hyandrial bristle phenotypes in *ABD-B RNAi* lines and mitotic clones**

*Abd-B RNAi* was induced with different *GAL4* drivers and *Abd-B<sup>M1</sup>* and *Abd-B<sup>D18</sup>* mutations were used in mitotic clones. The number of dissected flies and recognizable hypandrium with a shape similar to wild-type are shown. The number of hypandrium with 0, 1, 2, 3 or with 2 misplaced bristles are shown in separate columns. Different bristle phenotypes are indicated with the following labels: n: normal, t: thin, s: shorter than wild-type, M: Minute (thinner and slightly shorter than wild-type), y+: non yellow, y-: yellow, R: 2 bristles on the right, L: 2 bristles on the left.

| Genotype                                                                                                      | Number of dissected flies | Number of recognizable hypandrium | 0 bristle | 1 bristle            | 2 bristles                                                                                | 3 bristles | 2 misplaced bristle    |
|---------------------------------------------------------------------------------------------------------------|---------------------------|-----------------------------------|-----------|----------------------|-------------------------------------------------------------------------------------------|------------|------------------------|
| <i>Abd-B.RNAi<sup>26746</sup>/NP6333-GAL4</i>                                                                 | 50                        | 0                                 |           |                      |                                                                                           |            |                        |
| <i>Abd-B.RNAi<sup>26746</sup>/NP5130-GAL4</i>                                                                 | 50                        | 0                                 |           |                      |                                                                                           |            |                        |
| <i>Abd-B.RNAi<sup>51167</sup>/NP6333-GAL4</i>                                                                 | 50                        | 9                                 |           | 1(t,s)               | 6(t,s)                                                                                    | 1(t,s)     | 1(L)                   |
| <i>Abd-B.RNAi<sup>51167</sup>/NP5130-GAL4</i>                                                                 | 50                        | 11                                |           |                      | 9(t,s)                                                                                    |            | 1(L), 1(R)             |
| <i>Abd-B.RNAi<sup>51167</sup>/GMR18C05-GAL4</i>                                                               | 10                        | 10                                |           |                      | 7(n), 3(t)                                                                                |            |                        |
| <i>yw hsflp122; FRT82B hs-CD2 y+ M(3) w<sup>123</sup> /FRT82B Abd-B<sup>M1</sup> red[1] e[11] ro[1] ca[1]</i> | 30                        | 10                                | 2         | 2(M,y <sup>+</sup> ) | 2(M,y <sup>+</sup> ),<br>1(M,y <sup>-</sup> ),<br>1(M,y <sup>+</sup> ; M,y <sup>-</sup> ) |            | 2(R,M,y <sup>-</sup> ) |
| <i>yw hsflp122; FRT82B hs-CD2 y+ M(3) w<sup>123</sup> /FRT82B Abd-B<sup>D18</sup></i>                         | 52                        | 2                                 | 1         | 1(y <sup>+</sup> )   |                                                                                           |            |                        |

10



1 **AUXILIARY DATA FILES**

2 **Data S1. QTL-data (separate file)**

3 Data for Fig. 2.

4 **Data S2. Hypondrial bristle number with *18C05-GAL4* constructs (separate file)**

5 Data for Fig. 3.

6 **Data S3. Hypondrial bristle number with *18C05-sc* constructs (separate file)**

7 Data for Fig. 3., Fig S3., Fig S4.

8 **Data S4. Sex comb tooth number with various *18C05yak-sc* constructs (separate file)**

9 Data for Fig. 4.

10 **Data S5. Genital bristle numbers in *D. yakuba* and *D. santomea* strains (separate file)**

11 Data for Fig. S1.

12 **Data S6. Hypondrial bristle number with *18C05 melanogaster-GAL4* constructs (separate file)**

13 Data for Fig. S5.

14 **Data S7. Hypondrial bristle number with chimeric constructs (separate file)**

15 Data for Fig. S8.

16 **Data S8. Sex comb tooth numbers in *D. yakuba*, *D. santomea* and in *D. melanogaster* Canton S  
17 and sc mutants (separate file)**

18 Data for Fig. S9.

19 **Data S9. Fractional occupancy data (separate file)**

20 Data for Fig. S11. EMSA shift intensity values measured by ImageJ and the calculated fractional  
21 occupancy.  
22

23 **Data S10. Number of GFP-positive cells in 5h APF pupal legs of *D. melanogaster* flies of genotype  
24 *18C05yak-GFP* or *18C05yakT1775G-GFP* or *18C05san-GFP* (separate file)**

25 Data for Fig. 4.  
26

1  
2

## SUPPLEMENTAL REFERENCES

29. Andolfatto, P., Davison, D., Erezylmaz, D., Hu, T.T., Mast, J., Sunayama-Morita, T., and Stern, D.L. (2011). Multiplexed shotgun genotyping for rapid and efficient genetic mapping. *Genome Res.* *21*, 610–617.
30. Broman, K.W., and Sen, S. (2009). *A Guide to QTL Mapping with R/qlt* 1st ed. (Springer).
31. Broman, K.W., Wu, H., Sen, S., and Churchill, G.A. (2003). R/qlt: QTL mapping in experimental crosses. *Bioinformatics* *19*, 889–890.
32. Haley, C.S., and Knott, S.A. (1992). A simple regression method for mapping quantitative trait loci in line crosses using flanking markers. *Heredity (Edinb)* *69*, 315–324.
33. Venken, K.J.T., Popodi, E., Holtzman, S.L., Schulze, K.L., Park, S., Carlson, J.W., Hoskins, R.A., Bellen, H.J., and Kaufman, T.C. (2010). A molecularly defined duplication set for the X chromosome of *Drosophila melanogaster*. *Genetics* *186*, 1111–1125.
34. Turissini, D.A., McGirr, J.A., Patel, S.S., David, J.R., and Matute, D.R. (2017). The rate of evolution of postmating-prezygotic reproductive isolation in *Drosophila*. *Mol. Biol. Evol.*
35. Schneider, C.A., Rasband, W.S., and Eliceiri, K.W. (2012). NIH Image to ImageJ: 25 years of image analysis. *Nature methods* *9*, 671–675.
36. Taylor, B.J. (1989). Sexually dimorphic neurons in the terminalia of *Drosophila melanogaster*: I. Development of sensory neurons in the genital disc during metamorphosis. *J. Neurogenet.* *5*, 173–192.
37. Dietzl, G., Chen, D., Schnorrer, F., Su, K.-C., Barinova, Y., Fellner, M., Gasser, B., Kinsey, K., Oppel, S., Scheiblauer, S., *et al.* (2007). A genome-wide transgenic RNAi library for conditional gene inactivation in *Drosophila*. *Nature* *448*, 151–156.
38. Jenett, A., Rubin, G.M., Ngo, T.-T., Shepherd, D., Murphy, C., Dionne, H., Pfeiffer, B.D., Cavallaro, A., Hall, D., Jeter, J., *et al.* (2012). A GAL4-driver line resource for *Drosophila* neurobiology. *Cell reports* *2*, 991–1001.
39. Gibson, D.G., Young, L., Chuang, R.-Y., Venter, J.C., Hutchison, C.A., and Smith, H.O. (2009). Enzymatic assembly of DNA molecules up to several hundred kilobases. *Nature methods* *6*, 343–345.
40. Bryne, J.C., Valen, E., Tang, M.-H.E., Marstrand, T., Winther, O., da Piedade, I., Krogh, A., Lenhard, B., and Sandelin, A. (2007). JASPAR, the open access database of transcription factor-binding profiles: new content and tools in the 2008 update. *Nucleic acids research* *36*, D102–D106.
41. Zhu, L.J., Christensen, R.G., Kazemian, M., Hull, C.J., Enuameh, M.S., Basciotta, M.D., Brasefield, J.A., Zhu, C., Asriyan, Y., Lapointe, D.S., *et al.* (2010). FlyFactorSurvey: a database of *Drosophila* transcription factor binding specificities determined using the bacterial one-hybrid system. *Nucleic acids research* *39*, D111–D117.
42. Crawley, M.J. (2012). *The R book* (John Wiley & Sons).
43. Hilbe, J.M. (2014). *Modeling Count Data* (Cambridge University Press).
44. Zuur, A., Ieno, E.N., Walker, N., Saveliev, A.A., and Smith, G.M. (2011). *Mixed Effects Models and Extensions in Ecology with R* Softcover reprint of hardcover 1st ed. 2009 edition. (New York, NY: Springer).
45. Team, R.C. (2016). R: A language and environment for statistical (Vienna, Austria) Available at: <http://www.R-project.org/>.
46. Bates, D., Mächler, M., Bolker, B., and Walker, S. (2014). Fitting linear mixed-effects models using lme4. arXiv preprint arXiv:1406.5823.

47. Hothorn, T., Bretz, F., and Westfall, P. (2008). Simultaneous inference in general parametric models. *Biometrical journal* *50*, 346–363.
48. Bretz, F., Hothorn, T., and Westfall, P. (2010). *Multiple comparisons using R* (CRC Press).
49. Holm, S. (1979). A simple sequentially rejective multiple test procedure. *Scandinavian journal of statistics*, 65–70.
50. Frangioni, J.V., and Neel, B.G. (1993). Solubilization and purification of enzymatically active glutathione S-transferase (pGEX) fusion proteins. *Analytical biochemistry* *210*, 179–187.
51. Fan, Y.-J., Gittis, A.H., Juge, F., Qiu, C., Xu, Y.-Z., and Rabinow, L. (2014). Multifunctional RNA Processing Protein SRm160 Induces Apoptosis and Regulates Eye and Genital Development in *Drosophila*. *Genetics* *197*, 1251–1265.
52. Chatterjee, S.S., Uppendahl, L.D., Chowdhury, M.A., Ip, P.-L., and Siegal, M.L. (2011). The female-specific doublesex isoform regulates pleiotropic transcription factors to pattern genital development in *Drosophila*. *Development* *138*, 1099–1109.
53. Skaer, N., Pistillo, D., and Simpson, P. (2002). Transcriptional heterochrony of scute and changes in bristle pattern between two closely related species of blowfly. *Developmental biology* *252*, 31–45.
54. Casanova, J., Sánchez-Herrero, E., and Morata, G. (1986). Identification and characterization of a parasegment specific regulatory element of the abdominal-B gene of *Drosophila*. *Cell* *47*, 627–636.
55. Hopmann, R., Duncan, D., and Duncan, I. (1995). Transvection in the *iab-5*, *6*, *7* region of the bithorax complex of *Drosophila*: homology independent interactions in trans. *Genetics* *139*, 815–833.
56. Xu, T., and Rubin, G.M. (1993). Analysis of genetic mosaics in developing and adult *Drosophila* tissues. *Development* *117*, 1223–1237.
57. Estrada, B., and Sánchez-Herrero, E. (2001). The Hox gene Abdominal-B antagonizes appendage development in the genital disc of *Drosophila*. *Development* *128*, 331–339.
58. Maroni, G. and S.C. Stamey (1983). Developmental profile and tissue distribution of alcohol dehydrogenase. *Drosophila Information Service* *59*.
59. Andres, A.J., and Thummel, C.S. (1994). Methods for quantitative analysis of transcription in larvae and prepupae. *Methods Cell Biol.* *44*, 565–573.
- 59b. Corson, F., Couturier, L., Rouault, H., Mazouni, K., & Schweisguth, F. (2017). Self-organized Notch dynamics generate stereotyped sensory organ patterns in *Drosophila*. *Science*, *356*(6337), eaai7407.
60. Campuzano, S., Carramolino, L., Cabrera, C.V., Ruíz-Gómez, M., Villares, R., Boronat, A., and Modolell, J. (1985). Molecular genetics of the achaete-scute gene complex of *D. melanogaster*. *Cell* *40*, 327–338.
61. Carramolino, L., Ruiz-Gomez, M., del Carmen Guerrero, M., Campuzano, S., and Modolell, J. (1982). DNA map of mutations at the scute locus of *Drosophila melanogaster*. *The EMBO journal* *1*, 1185.
62. Cubas, P., De Celis, J.F., Campuzano, S., and Modolell, J. (1991). Proneural clusters of achaete-scute expression and the generation of sensory organs in the *Drosophila* imaginal wing disc. *Genes & Development* *5*, 996–1008.
63. Kvon, E.Z., Kazmar, T., Stampfel, G., Yáñez-Cuna, J.O., Pagani, M., Schernhuber, K., Dickson, B.J., and Stark, A. (2014). Genome-scale functional characterization of *Drosophila* developmental enhancers in vivo. *Nature* *512*, 91–95., 91–95.
